27 **Abstract (323 words)**

- 28 1. To mitigate effects of climate change it is important to understand species  
29 responses to increasing temperatures. This has often been done by studying survival  
30 or activity at temperature extremes. Before such extremes are reached, however,  
31 effects on fertility may already be apparent.
- 32 2. Sex differences in the thermal sensitivity of fertility (TSF) could impact species  
33 persistence under climate warming because female fertility is typically more limiting  
34 to population growth than male fertility. However, little is known about sex  
35 differences in TSF.
- 36 3. Here we first demonstrate that the mating system can strongly influence TSF using  
37 the seed beetle *Callosobruchus maculatus*. We exposed populations carrying  
38 artificially induced mutations to two generations of short-term experimental  
39 evolution under alternative mating systems, manipulating the opportunity for  
40 natural and sexual selection on the mutations. We then measured TSF in males and  
41 females subjected to juvenile or adult heat stress.
- 42 4. Populations kept under natural and sexual selection had higher fitness, but similar  
43 TSF, compared to control populations kept under relaxed selection. However,  
44 females had higher TSF than males, and strikingly, this sex difference had increased  
45 over only two generations in populations evolving under sexual selection.
- 46 5. We hypothesized that an increase in male-induced harm to females during mating  
47 had played a central role in driving this evolved sex difference, and indeed, remating  
48 under conditions limiting male harassment of females reduced both male and  
49 female TSF. Moreover, we show that manipulation of mating system parameters in  
50 *C. maculatus* generates intraspecific variation in the sex difference in TSF equal to  
51 that found among a diverse set of studies on insects.
- 52 6. Our study provides a causal link between the mating system and TSF. Sexual  
53 conflict, (re)mating rates, and genetic responses to sexual selection differ among  
54 ecological settings, mating systems and species. Our study therefore also provides  
55 mechanistic understanding for the variability in previously reported TSFs which can  
56 inform future experimental assays and predictions of species responses to climate  
57 warming.

## 58 Introduction

59 To predict evolutionary trajectories of natural populations experiencing warming climates, it  
60 is necessary to understand selection on, and the genetic architecture of, traits which  
61 expression depend heavily on temperature (Bubliy et al., 2012; Chevin et al., 2013;  
62 Hoffmann & Sgrò, 2011; Walters et al., 2012). Typical estimates of thermal sensitivity  
63 describe the temperatures at which individuals fail to maintain basic physiological functions  
64 such as controlled locomotion and respiration (Lutterschmidt & Hutchison, 1997).  
65 Approaches to predict organismal responses relying exclusively on such measures are  
66 however bound to neglect a variety of sublethal effects that will arise at less extreme  
67 temperatures, the most important being reductions in fertility (Angilletta, 2009; Chirgwin et  
68 al., 2021; Walsh et al., 2019; Parratt et al., 2021; Hoffmann et al., 2013; Kellermann &  
69 Heerwaarden, 2019). Indeed, already a slight decrease in fertility can have dramatic effects  
70 on population viability (Degioanni et al., 2019) and thermal plasticity in reproductive traits is  
71 widespread (Dell et al., 2011; Deutsch et al., 2008; Frazier et al., 2006) and often observable  
72 at a significantly lower temperature threshold than responses in viability (Angilletta, 2009;  
73 Gerking & Lee, 1983; Hoffmann, 2010; Loisel et al., 2019; van Heerwaarden & Sgrò, 2021).  
74 Hence, it is crucial to incorporate estimates of the thermal sensitivity of fertility (from  
75 hereon: TSF) into predictions of population persistence (Angilletta, 2009; Parratt et al.,  
76 2021; Walsh et al., 2019).

77 In many sexually reproducing species, population growth is mainly dependent on female  
78 fertility (Caswell, 2006). Female TSF may therefore be more consequential for population  
79 viability under climate warming, highlighting the need for a more thorough understanding  
80 of sex-differences in TSF (Iossa, 2019). For example, if male fertility is more sensitive to  
81 elevated temperatures, but assuming some shared genetic basis for TSF in the two sexes,  
82 genetic variation with deleterious effects on female TSF could effectively be purged at  
83 elevated temperatures while limiting the cost of adaptation (*sensu* Haldane 1957) mainly to  
84 males. Such male-biased purging of deleterious alleles affecting TSF could thus proceed with  
85 little reduction in population growth, which would aid evolutionary rescue of sexually  
86 reproducing species facing warming climates (Godwin et al., 2020; Manning, 1984;  
87 Martinossi-Aliliberti et al., 2019; Plesnar-Bielak et al., 2012; Whitlock & Agrawal, 2009). It has  
88 been suggested that male reproduction is more affected by elevated temperature in both

89 endotherms (Hansen, 2009) and ectotherms (David et al., 2005; Jørgensen et al., 2006).  
90 However, male and female reproductive physiologies are vastly different (García-Roa et al.,  
91 2020; Kodric-Brown & Brown, 1987), questioning whether genetic responses to selection on  
92 TSF in one sex would be consequential for TSF in the other. On the other hand, some  
93 general buffering mechanisms against elevated temperature, such as antioxidant defences  
94 (Dowling & Simmons, 2009) or molecular chaperones aiding protein translation and folding  
95 (Feder et al., 2000), are costly to produce and may depend strongly on the overall condition  
96 and genetic quality of the individual. Such responses may therefore be much more likely to  
97 share a genetic basis between the sexes (Andersson, 1994; Rowe & Houle, 1996; Tomkins et  
98 al., 2004).

99 Sex differences are often rooted in the operation of sexual selection and mating systems,  
100 and it is possible that sex-specificity in TSF could trace back to general differences in male  
101 and female reproductive physiologies ingrained in the evolution of anisogamy. However,  
102 fine-grained variation in sexual selection and mating systems is also likely to play an  
103 important role in shaping male and female TSF (García-Roa et al., 2020; Gómez-Llano et al.,  
104 2020; Martinossi-Allibert et al., 2019; Pilakouta & Ålund, 2021; Svensson et al., 2020). For  
105 example, success under post-copulatory sexual selection (i.e. sperm competition) can  
106 depend on both gamete quality (Gage et al., 2004; Hosken et al., 2003; McNamara et al.,  
107 2014) and the overall genetic quality of the male (Hosken et al., 2003), suggesting that  
108 sexual selection for genetic quality could increase tolerance to thermal stress. However,  
109 sperms' tolerance of oxidative stress, and therefore likely also high temperature, can be  
110 affected by investment in precopulatory traits (Dowling & Simmons, 2009; Helfenstein et al.,  
111 2010) and studies have suggested that male gamete quality may trade-off with investment  
112 into reproductive competition (Baur & Berger, 2020; Silva et al., 2019). Female reproduction  
113 is also sensitive to temperature, especially since egg maturation and oviposition are two  
114 highly temperature-dependent processes (Angilletta, 2009; Berger et al., 2008; Kingsolver &  
115 Huey, 2008), and it is likely that female TSF could be modulated further by pre- and post-  
116 fertilization mating interactions. For example, physical harm inflicted via male harassment  
117 of females during copulation, or physiological harm mediated via toxic ejaculate compounds  
118 (Arnqvist & Rowe, 2005; Dougherty et al., 2017; Parker, 2006), could increase female TSF, if  
119 TSF is dependent on the condition of the individual and costly thermal buffering

120 mechanisms. On the other hand, some ejaculate compounds typically have beneficial effects  
121 in females (Arnqvist & Nilsson, 2000; Karlsson et al., 1997; Oku et al., 2019; Reinhardt et al.,  
122 2009; Savalli & Fox, 1999), and remating could potentially improve male fertility via gamete  
123 renewal, suggesting that multiple mating also may have positive effects on TSF. This  
124 suggests that sex differences in TSF are bound to vary dynamically with mating system  
125 parameters which could have important consequences for evolutionary demography in  
126 sexually reproducing species.

127 Here we explore the role of the mating system in shaping sex differences in TSF in  
128 populations of the polyandrous seed beetle *Callosobruchus maculatus*. We first quantified  
129 how natural and sexual selection on artificially induced mutations affected short-term  
130 evolutionary responses in male and female TSF. This approach was motivated by i) theory  
131 often assuming that sexual selection is a more potent force of purifying selection against  
132 deleterious genetic variation compared to natural selection (Rowe & Houle 1996, Tomkins  
133 et al. 2004, Whitlock & Agrawal 2009) and that purging of deleterious genetic variation is  
134 much more efficient via sexual selection in males in *C. maculatus* (Grieshop et al., 2016,  
135 2020), ii) that compensatory physiological responses to temperature stress are costly (Feder  
136 et al., 2000) suggesting that TSF may be dependent on the condition and overall genetic  
137 quality of the individual, and iii) that elevated temperature can increase the effects of  
138 deleterious genetic variation in ectotherms (Berger et al., 2021).

139 To this end, we induced an appreciable genetic load via mutagenesis in replicate  
140 populations that were subsequently propagated for two generations under three alternative  
141 experimental evolution regimes: polygamy (imposing natural and sexual selection), enforced  
142 monogamy (natural selection only), and relaxed selection (natural and sexual selection  
143 removed). Comparisons to the ancestral (non-irradiated) populations allowed us to assess  
144 the relative impact of the induced mutations and the extent to which the two mating  
145 systems (polygamy and monogamy) had purged the mutations relative to the relaxed  
146 selection treatment. Thus, in addition to providing information on sex differences in TSF in  
147 *C. maculatus*, this panel of populations allowed us to assess not only sex-specific effects of  
148 *de novo* mutations on TSF but also how natural and sexual selection on *de novo* mutations  
149 influence sex differences in TSF.

150 We conducted the experiment using two different types of heat stress. We applied a short-  
151 term but high intensity heat shock on adult beetles, reflecting extreme daily maximal  
152 temperatures, which are predicted to increase in frequency due to climate change (Johnson  
153 et al., 2018). In a parallel experiment using the same populations, we applied long-term heat  
154 stress throughout the entire larval development, as may result from increasing variation in  
155 average monthly temperatures (Bathiany et al., 2018; Varela et al., 2020). We find no  
156 evidence that the genetic load of a population is related to its average TSF. Strikingly,  
157 however, experimental evolution under sexual selection increased sex differences in TSF in  
158 only two generations. To elucidate the mechanism behind this result we measured TSFs  
159 while manipulating male-female (re)mating interactions. Our results show that the mating  
160 system can be a key driver of realized TSF in males and females.

161

## 162 **Methods**

### 163 **Study population**

164 *Callosobruchus maculatus* is a common pest on fabaceous seeds in tropical and subtropical  
165 regions. Females cement eggs onto host seeds and the larvae burrow into the seed where  
166 they complete their development within 3 weeks under standard laboratory conditions (29°  
167 C, 12L:12D light cycle, 55% rel. humidity), on their preferred host, *Vigna unguiculata* (Fox,  
168 1993). Unless otherwise stated, these conditions were also used in the experiments  
169 described below. Egg-to-adult survival is above 90% in the populations used here. Adults are  
170 facultatively aphageous and start reproducing within hours after emergence. Under  
171 laboratory conditions without food or water adult beetles live just over one week with most  
172 of the reproduction taking place within the first few days (Fox, 1993). *C. maculatus* has a  
173 polyandrous mating system with documented sexual conflict over (re)mating and high  
174 remating rates, leading to both pre- and post-copulatory sexual selection on males (Berger  
175 et al., 2016; Crudgington & Siva-Jothy, 2000; Eady, 1995; Gay et al., 2009; Hotzy & Arnqvist,  
176 2009). Once a male manages to successfully initiate copulation, spines on its genitalia help  
177 to prevent it from being dislodged but at the same time harm the female (Bagchi et al.,  
178 2021; Edvardsson & Tregenza, 2005; Rönn et al., 2007; Rönn & Hotzy, 2012). The effects of  
179 the genital spines and the harm imposed on the females have been found to correlate with

180 a male's sperm competitiveness (Hotzy & Arnqvist, 2009) and, in a congener that exhibits  
181 similar genital structures, also increase female oviposition rate as a response to genital  
182 scarring (Haren et al., 2017). Female reproductive behaviour is further modulated by  
183 lifespan-extending nutrients and water (Rönn et al., 2006) and likely also other functional  
184 compounds in the male ejaculate (Bayram et al., 2019), suggesting that the male ejaculate  
185 can have both positive and negative effects on female fertility (Arnqvist et al., 2004; Yamane  
186 et al., 2015).

187 The stock used for the experimental populations originates from 41 iso-female lines  
188 sampled in Lomé, Togo (06°10#N 01°13#E) (see Berger et al., 2014) that were mixed and  
189 maintained at large population size ( $N > 300$ ) for roughly 50 generations under standard  
190 conditions prior to the start of this experiment.

191

## 192 **Mutagenesis**

193 The stock population was split into three replicate founder populations (Fig. 1a). We first  
194 introduced a genetic load in the three founders by exposing male beetles to 25 Gy of  $\gamma$ -  
195 radiation over 32 minutes (dose rate:  $\sim 0.79$  Gy/min). This dose is known to reduce  
196 laboratory fertility (i.e., number of emerging adults) of the parental generation by roughly  
197 70% and that of F1 offspring by roughly 40% (Baur & Berger, 2020; Grieshop et al., 2016). All  
198 irradiated males ( $N = 150$  per founder) were virgin and eclosed between 0 and 24 hours  
199 prior to irradiation. All males were then mated to a randomly assigned female (enforced  
200 monogamy) which was allowed to lay eggs for 48 hours. All egg-laden beans were mixed  
201 and distributed into three aliquots marking the starting point for the three different  
202 experimental evolution regimes (see below). At this point, all offspring are expected to carry  
203 a random set of mutations induced via their fathers. Another 150 control (non-irradiated)  
204 males were used to seed the control population for each founder. These control populations  
205 were propagated according to standard laboratory protocol.

206

## 207 **Experimental Evolution regimes**

208 The selection regime protocols (Fig. 1a), outlined below, have previously been described  
209 and used in several, more long-term (up to 60 generations), experimental evolution studies  
210 in *C. maculatus* and have been shown to result in pronounced sex-specific adaptations  
211 (Bagchi et al., 2021; Baur et al., 2019; Baur & Berger, 2020; Martinossi-Allibert et al., 2019).

212 *Monogamy*: This regime removes sexual selection but applies natural (fecundity) selection  
213 on females and males. Within 72 hours after eclosion, 100 virgins of each sex were picked  
214 and randomly paired and allowed to mate for 5 hours. During this period, the male and  
215 female could freely interact and mate repeatedly. After 5 hours the males were removed,  
216 and all females were collected and placed together in a 1liter jar containing host seeds *ad*  
217 *libitum*. After 48 hours of egg laying the females were removed. To ensure minimal larval  
218 competition and viability selection, all populations used in this experiment were provided  
219 with beans *ad libitum* for egg deposition (~4800 black-eyed beans).

220 *Polygamy*: This regime simulates the natural mating system, including sexual and natural  
221 selection on males and females. 100 virgin males and 100 virgin females were picked within  
222 72 hours after eclosion and collected in a 1-liter jar with beans *ad libitum*. The beetles could  
223 freely interact, compete, mate and lay eggs for 48 hours, after which all beetles were  
224 removed. This mating scheme was also used to propagate the non-irradiated control  
225 populations and corresponds to the standard laboratory protocol.

226 *Relaxed selection*: This regime removes both natural and sexual selection to retain the  
227 induced (non-lethal) deleterious mutations in the populations. Within 72 hours after  
228 eclosion, 100 virgin females and 100 virgin males were assigned to form random  
229 monogamous couples (avoiding inbreeding) as in the monogamous mating regime.  
230 Thereafter, males were removed, and each female was provided with beans *ad libitum*.  
231 Females laid eggs for 48 hours in isolation, after which all females were removed from the  
232 beans. In the next generation offspring were picked so that each parental couple  
233 contributed exactly one female and one male to the next generation.

234 After two generations of propagation under the respective selection regimes, we applied  
235 one generation of common garden relaxed selection to all 12 populations to both  
236 counteract potential differences in parental effects brought about by the different evolution  
237 regimes, and to prevent further selection against deleterious mutations (Fig. 1a). We then



238 established 30 mating couples per population (total  $n_{\text{family}} = 360$ ). After mating we allowed  
239 the female to lay eggs for 48 hours. We then removed the female and evenly split the beans  
240 from each female into one half that was subjected to the **Juvenile heat stress** treatment  
241 (outlined below), and one half that was kept developing at benign 29°C. The beetles  
242 developing at 29°C were assigned to undergo the **Adult heat-shock** treatment (outlined  
243 below) or to remain untreated and serve as control for both heat treatments (Fig. 1a).

244

## 245 **1. Juvenile heat stress**

246 **1.1.** This experiment was designed to resemble a longer period of elevated temperature as  
247 for example a heat wave, which can occur in the months of March and April in Lomé, Togo.  
248 Current projections for Lomé predict an increase of the average daily maximal temperature  
249 in the months from February to April from 32°C in the late 20<sup>th</sup> century, up to a maximum of  
250 37.2°C by the end of the 21<sup>st</sup> century (Varela et al., 2020). Beetles assigned to this  
251 treatment developed at an elevated temperature of 35°C throughout their entire larval and  
252 pupal stage (ca. 21 days in total). After eclosion, we crossed two treated male and two  
253 treated female individuals per family with untreated individuals from other families within  
254 the same population, allowing us to estimate the sex-specific fertility loss due to  
255 development at 35°C for each of the 12 populations. This resulted in a total of 818  
256 untreated couples, 458 couples with a treated female and 443 couples with a treated male,  
257 or roughly 40 couples per treated sex and population. Each couple was provided with beans  
258 *ad-libitum* in a 60 mm petri dish and allowed to mate and lay eggs for the rest of their lives.  
259 Emerging adult offspring were later counted to obtain the fertility of the couple.

260 **1.2. Re-mating and male harassment:** We hypothesized that one explanation for our results  
261 from the first experiment could be that females developing at stressful temperature might  
262 be worse at coping with the harm inflicted by males during mating, but may on the other  
263 hand benefit from nutrients in ejaculates. Using the stock population from which the  
264 experimental evolution populations were derived, we ran an experiment to tease apart  
265 potential effects of remating on female TSF mediated via harmful physical mating  
266 interactions and ejaculatory compounds. We exposed 24 hours old virgin heat-treated  
267 (developed at 35°C) and untreated (developed at 29°C) females to three male treatments

268 (all males developed at 29° C). The first treatment underwent a single observed mating,  
269 after which we removed the male and allowed the female to deposit eggs for the rest of her  
270 lifetime. Females of the second treatment were mated once per day to same male for three  
271 consecutive days. After the matings the male was removed. In the third treatment we co-  
272 reared the male and female for their entire life, allowing them to interact freely as was the  
273 case in the original experiment.

274 *1.3. Interaction of male and female heat stress:* We also tested whether the cumulative  
275 effects of female and male juvenile heat stress act in an additive manner on a couple's  
276 fertility. Beetles of both sexes, originating from the stock population, were reared at benign  
277 29°C and at stressful 35°C, as in the main experiment. Within 24 hours after emergence, we  
278 paired a male and female beetle of which either the male, the female, both sexes, or none  
279 of the sexes, had developed at elevated temperature. Males and females were co-reared for  
280 their entire life, and we counted the couple's reproductive output.

281

## 282 **2. Adult heat shock**

283 *2.1.* This experiment was designed to simulate a short-term heat extreme as occurring in the  
284 form of extreme daily maxima. We chose an exposure intensity of 50° C for 20 minutes  
285 because a pilot experiment showed that ca. 50% of the beetles are knocked-out in the  
286 process (no more perceptible movement) but at the same time it remains in the range that  
287 we consider ecologically relevant as such temperatures are likely to be reached in sun  
288 exposed microclimates within the range of this species (Deutscher Wetterdienst, n.d.). From  
289 the beetles that developed at benign temperature we randomly picked three adult female  
290 and three adult male beetles per family, resulting in 818 untreated couples, 500 couples  
291 with a treated female and 540 couples with a treated male. We put beetles in a perforated  
292 0.5 ml Eppendorf tube placed in a closed 200 mm petri dish on a heating plate set to 50°C.  
293 The air temperature inside the upper part of the petri dish was also monitored and  
294 remained constant at 43°C for the duration of the treatment. We paired all heat-exposed  
295 beetles with an untreated individual of opposite sex from a different family, but of the same  
296 population. Each couple was provided with *ad-libitum* beans in a 60 mm petri dish and  
297 lifetime reproductive output was recorded.

298 *2.2. Male recovery:* Using the stock population, we investigated if recovery of the male after  
299 heat shock may have shaped the observed sex differences in TSF in the main experiment  
300 outlined above. We allowed one group of males to mate 2 hours after the heat shock  
301 treatment. Beetles of this group were then allowed to mate again 26 hours after heat shock.  
302 The second group of male beetles were only allowed to mate once, after 26 hours. Beetles  
303 assigned to the untreated control group were subdivided into the same two groups to  
304 control for a possible decline in fertility due to repeated mating, although this has been  
305 shown to be minimal in *C. maculatus* (Rönn et al., 2008). This allowed us to independently  
306 estimate effects of recovery over time and recovery through mating causing ejaculate  
307 replacement on male TSF.

308

### 309 **Statistical analysis:**

310 All analyses were executed in R (R Core Team, 2020). We fitted generalized linear mixed  
311 models assuming a Poisson distributed response using the lme4-package (Bates et al., 2015,  
312 p. 4) unless stated otherwise. The R package ggplot2 (Wickham, 2016) was used for  
313 graphical illustration. P-values were calculated using the package car (Fox & Weisberg, 2019)  
314 using type-II sums of squares. Planned post-hoc comparisons, applying Tukey correction,  
315 were conducted using the package emmeans (Lenth, 2020).

316 *1.1 & 2.1 Sex-specific TSF in evolution regimes.* Offspring number was used as the response  
317 while evolution regime and treatment (male stress, female stress or untreated), as well as  
318 their interaction, were added as fixed effects. We also added experimental block and the  
319 identity of the experimenter counting offspring as additional terms. Population replicate  
320 crossed with treatment, as well as dam and sire effects, were included as random effects.  
321 Additionally, an observation level random effect (OLRE) was included to control for over-  
322 dispersion.

323 *1.2. Re-mating and male harassment:* We analysed main effects of female development  
324 treatment (29°C/35°C), mating (single/multiple) and cohabitation (isolated/cohabiting), as  
325 well as two-way interactions between development treatment and mating and  
326 cohabitation, respectively. Experimental date was added as an additional main effect. We  
327 assumed quasi-Poisson distributed errors in both models.

328 *1.3. Interaction of male and female heat stress:* We analysed effects of female development  
329 treatment (29°C/35°C), male development treatment (29°C/35°C) and their interaction as  
330 fixed factors.

331 *2.2 Male recovery:* We analysed effects of a recovery treatment (mated 2 or 26 hours after  
332 the heat shock) with and without remating separately. To test for the effect of remating  
333 after heat shock, we ran a generalized linear mixed model with a Poisson response including  
334 treatment (untreated, heat shocked), mating number (one (2h) or two (26h)) and their  
335 interaction as fixed effects, and male identity as well as an OLRE as a random effect. We  
336 used the same model type and structure but without the male ID and the interaction term  
337 because males only mated once. In this model treatment included untreated, heat shock  
338 and 2 hours recovery, and heat shock and 26 hours recovery.

339

## 340 **Results**

341 There were pronounced fertility differences between irradiated and control populations  
342 when assayed only in the benign environment (i.e., untreated beetles), illustrating that  
343 mutagenesis had induced a sizeable genetic load ( $\chi^2 = 60.88$ ,  $df = 3$ ,  $p < 0.001$ ) (Fig. 1c,  
344 Supplementary table 1). Pairwise post-hoc comparisons revealed that the regime under  
345 relaxed selection carried a larger genetic load than the monogamy and the polygamy  
346 regime, demonstrating efficient purging of deleterious mutation during experimental  
347 evolution (Tukey<sub>relax-poly</sub>:  $z = -4.52$ ,  $p < 0.001$ ; Tukey<sub>relax-mono</sub>:  $z = -5.16$ ,  $p = p < 0.001$ ). There  
348 was no difference in fertility between the monogamy and polygamy regime (Tukey<sub>poly-mono</sub>:  $z$   
349  $= -0.68$ ,  $p = 0.91$ ). All pairwise contrasts in supplementary table S1.

350

## 351 **Juvenile heat stress**

352 *1.1.* Elevated temperature during juvenile development strongly reduced the reproductive  
353 output of adults ( $\chi^2 = 179.07$ ,  $df = 2$ ,  $p < 0.001$ ). In the control populations, a female  
354 developing at 35°C showed an average reduction in fertility of 32% (31 fewer offspring)  
355 compared to an untreated female, while male fertility was reduced by 22% (21 fewer  
356 offspring). To investigate if the induced mutations affected TSF, we first compared the effect

357 of heat stress in the control regime and the regime evolving under relaxed selection  
358 (containing the largest genetic load; Fig. 1c). We found no evidence that genetic load  
359 affected TSF ( $X^2 = 3.75$ ,  $df = 2$ ,  $p = 0.15$ ). Strikingly, however, sex differences in TSF  
360 depended on selection regime (sex:regime;  $X^2 = 14.04$ ,  $df = 6$ ,  $p = 0.029$ ) (Fig. 2a, b). There  
361 were clear reductions in fertility via heat stress in both sexes in all but the polygamy regime,  
362 where exposed males showed no statistically significant fertility loss (Fig. 2a, Supplementary  
363 table S2;). To directly assess the effect of sexual selection on TSF we compared the  
364 monogamy (natural selection) and polygamy (natural + sexual selection) regimes. This  
365 analysis confirmed the results of the global model (sex:regime;  $X^2 = 6.96$ ,  $df = 2$ ,  $p = 0.030$ ,  
366 Fig 2b). Heat-treated females from the polygamy regime produced significantly fewer  
367 offspring than heat-treated females from the monogamy regime (Tukey<sub>poly\_female35-</sub>  
368 <sub>mono\_female35</sub>:  $z = -2.08$ ,  $p = 0.04$ ), while heat-treated polygamy males instead tended to  
369 produce more offspring than heat-treated monogamy males, although this effect was not  
370 statistically significant (Tukey<sub>poly\_male35-mono\_male35</sub>:  $z = 1.41$ ,  $p = 0.16$ ). Full model specification  
371 and output in supplementary material S3.

372 1.2. To gain more insights into the underlying mechanisms responsible for the evolved sex  
373 difference in TSF, we ran an additional experiment on the stock population to investigate  
374 the role of repeated mating and male harassment on female TSF. Females exposed to  
375 juvenile heat stress suffered more under cohabitation with a male than females developing  
376 at benign temperature (temperature:cohabitation;  $X^2 = 4.53$ ,  $df = 1$ ,  $p = 0.033$ , Fig 2c), which  
377 could in part explain the evolved increase in female-bias of TSF observed in the polygamy  
378 regime, if polygamy males were more persistent during mating. Interestingly, there was also  
379 a positive effect of re-mating, and this effect was more beneficial in females developing at  
380 elevated temperature (temperature:mating;  $X^2 = 4.99$ ,  $df = 1$ ,  $p = 0.025$ ). Crucially, however,  
381 the beneficial effect of re-mating depended strongly on the exclusion of the male between  
382 matings (Tukey<sub>single\_35 vs. cohabitation\_35</sub>:  $z = -1.62$ ,  $p = 0.24$ , Tukey<sub>single\_35 vs. remated\_35</sub>:  $z = -4.345$ ,  $p$   
383  $< 0.0001$ , Fig. 2c); and strikingly, re-mating with experimental exclusion of the male between  
384 matings sufficed to completely thwart the negative effect of developmental temperature  
385 stress in females (Tukey<sub>remated\_29 vs. remated\_35</sub>:  $z = -0.40$ ,  $p = 0.69$ ). Hence, changes in the  
386 relative costs and benefits of multiple mating between the polygamy and monogamy regime  
387 is likely to have driven the evolved sex difference in TSF.

388 1.3. We also explored whether the effect of males on female TSF was dependent on  
389 whether males had also been exposed to heat. As expected, we found strong effects of both  
390 male and female developmental heat stress (Female:  $X^2 = 11.98$ ,  $df = 1$ ,  $p < 0.001$ ; Male:  $X^2 =$   
391  $10.75$ ,  $df = 1$ ,  $p = 0.001$ ) (Fig. 2d). The interaction between female and male heat stress,  
392 however, was non-significant, suggesting that the effects of female and male juvenile heat  
393 stress on TSF are mostly additive. This result might be explained by heat stress reducing the  
394 underlying male components with antagonistic effects on female TSF (level of male harm  
395 and beneficial ejaculate compounds) to similar extent.

396

### 397 **Effects of adult heat shock**

398 2.1. The adult heat shock treatment led to an overall loss of fertility ( $X^2 = 17.17$ ,  $df = 2$ ,  $p <$   
399  $0.001$ ) even though its impact was much weaker compared to the impact of juvenile heat  
400 stress (average fertility loss for females was 10.2% and for males 4.2%). The effect of heat  
401 shock was significantly stronger in females (Tukey<sub>female - male</sub>:  $z = -2.38$ ,  $p = 0.045$ ) and, in fact,  
402 not statistically detectable in males (Tukey<sub>untreated - male</sub>:  $z = 2.08$ ,  $p = 0.09$ ) (Fig. 3a,  
403 Supplementary table S2). The effect of heat shock was generally too weak to be detected  
404 when analysing subsets of the data (results not shown), resulting in neither the induced  
405 genetic load (regime<sub>control vs. relaxed</sub>:treated sex:  $X^2 = 0.44$ ,  $df = 2$ ,  $p = 0.88$ ) nor sexual selection  
406 (regime<sub>polygamy vs. monogamy</sub>:treated sex:  $X^2 = 0.43$ ,  $df = 2$ ,  $p = 0.81$ ) having a statistically  
407 significant effect on TSF. Full model specification and output in supplementary material S4.

408 2.2. To elucidate underlying mechanisms explaining sex differences in TSF under adult heat  
409 shock, we analysed effects of male recovery, in terms of both time and remating (inducing  
410 ejaculate renewal) after heat shock. Our data show that male beetles can recover almost  
411 completely from the applied heat shock treatment within a 26-hour recovery period. Males  
412 showed strong TSF, signified by an 18% reduction in fertility compared to the untreated  
413 control group, when mating within two hours after heat shock (Tukey<sub>untreated - 2 hours</sub>:  $z = 3.55$ ,  
414  $p = 0.001$ , Fig. 3b). If males were given 26 hours of recovery in isolation, however, no  
415 significant effect on fertility could be found (Tukey<sub>untreated - 26 hours</sub>:  $z = 1.14$ ,  $p = 0.49$ ) (Fig. 3b).  
416 Similarly, there was no reduction in fertility in beetles that mated a second time 26 hours  
417 after the treatment (Tukey<sub>untreated 2 hours - 2 hours</sub>:  $z = 0.64$ ,  $p = 0.003$ ; Tukey<sub>untreated 26 hours - 26</sub>

418  $_{\text{hours}}: z = 0.006, p = 1$ ) (Fig. 3c). Recovery with or without remating showed similar effects on  
419 TSF (Tukey $_{\text{heat 26 hours mate} - \text{heat 26 hours isolated}}: z = 0.33, p = 0.74$ ), suggesting that timing is crucial  
420 when assessing TSF, and that realized sex differences in TSFs in natural populations are  
421 state-dependent properties of mating system and ecology.

422

### 423 **Comparing intra- and interspecific variation in sex differences in TSF**

424 To put our results into perspective, we performed a (non-exhaustive) literature search for  
425 studies on other insects that had estimated effects of heat stress on both male and female  
426 fertility (summarized in Supplement S5 and S6). This allowed us to calculate and compare  
427 standardized estimates of sex differences in TSF (Fig. 4). The variability in this estimate  
428 obtained by manipulating mating system parameters and the timing of heat stress relative  
429 to (re)mating in our study roughly corresponds to that reported between species in  
430 previously published studies, demonstrating that the mating system can be a main  
431 determinate of sex differences in TSF. Moreover, in contrast to occasional claims of male  
432 biased TSF, there is no such consistent bias in the reviewed studies on insects estimating  
433 male and female TSF under the same experimental conditions.

434

## 435 **Discussion**

436 In this study we have demonstrated that the mating system can affect sex differences in TSF  
437 using the seed beetle *C. maculatus*. Strikingly, sexual selection on induced mutations over  
438 only two generations of experimental evolution led to increased female-bias in TSF in  
439 polygamous populations experiencing developmental heat stress. Male harassment  
440 aggravated the negative effects of heat stress on females, suggesting that increased male  
441 harassment might explain the increased female-bias in TSF in polygamous experimental  
442 populations. In *C. maculatus*, sexual selection in males is more than three times as effective  
443 at purging deleterious alleles compared to fecundity selection on females under semi-  
444 natural laboratory setting, as used here (Grieshop et al. 2016, Grieshop et al. 2021). One  
445 plausible mechanism behind the result is therefore that sexual selection in the polygamous  
446 mating regime led to more efficient purging of alleles with deleterious effects on male  
447 mating success, relative to purging of alleles with deleterious effects on female viability and

448 fertility, potentially shifting the balance between male persistence and female resistance  
449 during (re)mating interactions. Male-biased selection on deleterious alleles can also improve  
450 population fitness by sparing females the cost of adaptation (Manning 1984, Agrawal 2001,  
451 Siller 2001, Agrawal & Whitock 2009), if some of the deleterious alleles in males also have  
452 deleterious effects in females (Andersson 1994, Rowe & Houle 1996, Chippindale et al.  
453 2001, Tomkins 2004, Bonduriansky & Chenoweth 2009), for which there is evidence in *C.*  
454 *maculatus* (Grieshop et al. 2021). However, once males and females in the polygamous  
455 populations engaged in mating interactions, the heightened genetic quality of male  
456 genotypes evolving under strong sexual selection may have resulted in increased male  
457 harassment of females, and the negative effects of this sexual conflict may have been  
458 exposed under female heat stress. In nature, the relative extent of this negative effect  
459 should strongly depend on ecological settings and population densities modulating the  
460 degrees of conflict (Arbuthnott et al., 2014; Gomez-Llano et al., 2018; MacPherson et al.,  
461 2018; Yun et al., 2017). We also note that our comparison of monogamous and polygamous  
462 populations evolving from inflated levels of mutational variation does not describe a natural  
463 scenario of long-term evolution in populations under mutation-selection balance. Instead,  
464 our approach was designed to reveal how (sex-specific) natural and sexual selection can act  
465 on genetic variation to shape TSF. Hence, our study provides a proof-of-principle for a direct  
466 link between the mating system and sex differences in TSF.

467 At present, the scant literature available seems to suggest that male reproduction is more  
468 sensitive to heat stress than female reproduction (David et al., 2005; Porcelli et al., 2017;  
469 Sales et al., 2018), and male fertility has also been demonstrated to be very temperature-  
470 sensitive in *C. maculatus*. Our data show that *C. maculatus* females can in fact be more  
471 strongly affected by heat stress, and that the realized TSF in males and females can be  
472 highly contingent on the experimental design (see also: Terblanche et al., 2007) and mating  
473 system parameters such as the extent of sexual conflict and remating rates. For example,  
474 the adult heat shock treatment resulted in relatively weak effects on fertility, but with  
475 significant female-bias in TSF. However, our additional experiment showed that males fully  
476 recovered from heat shock within only 26 hours, implying that the sex-bias in TSF in adults is  
477 likely to change throughout life following heat exposure. In the case of juvenile heat stress,  
478 male harassment aggravated effects of heat stress on female fertility, while repeated



479 mating instead had positive effects on both male and female TSF. However, the size of the  
480 nuptial gift provided by male *C. maculatus* has been found to decrease with temperature,  
481 suggesting that this male compensatory effect may diminish when also males are heat  
482 stressed (Fox et al., 2006). Other studies on fruit flies (García-Roa et al., 2019, 2020) and *C.*  
483 *maculatus* (Martinossi-Alilibert et al., 2019), conclude that heat stress generally reduces the  
484 female fertility cost of male cohabitation. In both these studies the impact of sexual conflict  
485 was assessed directly in the stressful environment when both sexes were stressed, while in  
486 the present study the effects of mating interactions on fertility were measured in a benign  
487 environment after heat stress had been applied to one, or both sexes. Collectively, this  
488 limited set of studies suggest that there is a multitude of ways that temperature can  
489 modulate the consequences of sexual selection and conflict (Garcia-Roa et al. 2020), and  
490 conversely, that sexual selection and conflict can shape sensitivity to temperature  
491 (Martinossi-Alilibert et al. 2019). Depending on population density, mating system, and heat  
492 stress characteristics, laboratory experiments may thus lead to erroneous estimates of TSFs,  
493 and in extension, misjudgements of the threat on population growth imposed by climate  
494 warming, even when efforts are made to measure TSF sex-specifically. Indeed, our  
495 comparison of variation in sex differences in TSF generated by mating system parameters in  
496 our study, to that reported between species (Fig. 4), suggests that TSF is a highly dynamic  
497 property that responds to population structure and ecological changes.

498 Directly comparing the effects of our two heat stress treatments is difficult as they were  
499 applied with different intensities over different time frames and life stages. Nevertheless,  
500 juvenile heat stress is known to affect the development of reproductive organs and result in  
501 reduced sperm numbers in insects (Chirault et al., 2015; Kirk Green et al., 2019; Nguyen et  
502 al., 2013; Vasudeva et al., 2014). Vasudeva, Deeming and Eady (2014), found not only a  
503 decrease in sperm number but also a reduction in relative testis size by almost 25% in *C.*  
504 *maculatus* males exposed to similar juvenile heat stress as in our experiment. In a later  
505 study, the same authors determined the first 20% of larval development to be the most  
506 temperature sensitive period of testis development (Vasudeva et al., 2021). A recent study  
507 using the flour beetle *Tribolium castaneum* found that the most sensitive phase of testis  
508 development is likely during the pupal stage and that testis size can be almost complete  
509 recovered in males exposed to heat stress at an immature adult stage (Sales et al., 2021).

510 Together, these studies suggest that there are several time points with heightened  
511 temperature sensitivity throughout male reproductive development. Heat shock treatments  
512 applied on adults have also been found to decrease numbers of transferred sperm and  
513 reduce fertility (Chevrier et al., 2019; Sales et al., 2018, 2021), but considering the data  
514 presented here and in Sales et al. (2021), such effects may be reversible in most cases.  
515 Similar changes in the morphology of female reproductive organs (i.e. smaller ovaries)  
516 combined with a strong reduction in egg number have also been reported for flies of the  
517 species *Drosophila Suzuki* developing at elevated temperature (Kirk Green et al., 2019).  
518 However, little is known about the ability of female reproduction to recover from heat  
519 stress. Data from an experiment exposing newly emerged cotton bollworm females,  
520 *Helicoverpa armigera*, to a range of heat shock treatments shows a postponement of peak  
521 reproduction correlated to the treatment intensity, suggesting some recovery processes  
522 taking place between the heat shock event and the onset of reproduction (Mironidis &  
523 Savopoulou-Soultani, 2010). In summary, this suggest that, at least in holometabolous  
524 insects, heat stress during development can cause an impairment of reproductive organs  
525 which is only reversible given a considerable amount of recovery time (if at all), while heat  
526 shock experienced at the adult life stage might be reversible on shorter time scales.  
527 Importantly, however, we also show that strategies such as remating or postponement of  
528 reproduction may mitigate the impact of heat stress experienced both early and late in life.

529 Inducible compensatory responses that buffer the effects of heat stress are costly and may  
530 therefore depend on the genetic quality of the organism. Moreover, it has recently been  
531 shown that elevated temperatures can aggravate the deleterious effect of mutations  
532 (Berger et al., 2021). We therefore predicted that populations with larger genetic loads  
533 might show increased TSF but found no support for this in our data. The model applied by  
534 Berger et al. (2021) predicts that temperature-dependent increases in mutational effects  
535 stem from reversible misfolding of proteins at high temperature. It is possible that such  
536 effects were no longer apparent following heat stress in our experiment as individuals were  
537 shifted back to benign temperature (i.e., temperature-sensitive mutants either died during  
538 development, or survived and got “rescued” by being placed at benign temperature).  
539 Indeed, individuals surviving short term heat stress may even elicit compensatory stress  
540 responses that mitigate deleterious effects of mutations (Casanueva et al., 2012).

541 Additionally, as we here studied temperature effects in the adult stage, where realized TSFs  
542 are consequences of mating interactions, it is possible that a weakening of sexually  
543 antagonistic interactions in populations with large genetic loads (and low-condition  
544 individuals) may have contributed to mitigating the detrimental effects of temperature.  
545 Indeed, a general tenet highlighted throughout this study for how frequency-dependent  
546 processes in general (Bolnick et al., 2011; Brady et al., 2019; Dall et al., 2012; Svensson &  
547 Connallon, 2019), and sexual selection in particular (Chenoweth et al., 2015; García-Roa et  
548 al., 2020; MacPherson et al., 2018; Martinossi-Allibert et al., 2019; Martinossi-Allibert et al.,  
549 2019; Rankin et al., 2011; Yun et al., 2017) may affect population vulnerability and  
550 adaptation to abiotic factors.

551

552

553

554

## 555 **References**

- 556 Andersson, M. (1994). *Sexual Selection* (Vol. 72). Princeton University Press.
- 557 <https://doi.org/10.2307/j.ctvs32s1x>
- 558 Angilletta, M. J. (2009). *Thermal Adaptation: A Theoretical and Empirical Synthesis*. Oxford University
- 559 Press. <https://doi.org/10.1093/acprof:oso/9780198570875.001.1>
- 560 Arbuthnott, D., Dutton, E. M., Agrawal, A. F., & Rundle, H. D. (2014). The ecology of sexual conflict:
- 561 Ecologically dependent parallel evolution of male harm and female resistance in *Drosophila*
- 562 *melanogaster*. *Ecology Letters*, *17*(2), 221–228. <https://doi.org/10.1111/ele.12222>
- 563 Arnqvist, G., & Nilsson, T. (2000). The evolution of polyandry: Multiple mating and female fitness in
- 564 insects. *Animal Behaviour*, *60*(2), 145–164. <https://doi.org/10.1006/anbe.2000.1446>
- 565 Arnqvist, G., Nilsson, T., & Katvala, M. (2004). Mating rate and fitness in female bean weevils.
- 566 *Behavioral Ecology*, *16*(1), 123–127. <https://doi.org/10.1093/beheco/arh119>
- 567 Arnqvist, G., & Rowe, L. (2005). *Sexual Conflict*. Princeton University Press.
- 568 <https://books.google.se/books?id=JLfwPqsHnMC>
- 569 Bagchi, B., Corbel, Q., Khan, I., Payne, E., Banerji, D., Liljestrand-Rönn, J., Martinossi-Allibert, I., Baur,
- 570 J., Sayadi, A., Immonen, E., Arnqvist, G., Söderhäll, I., & Berger, D. (2021). Sexual conflict
- 571 drives micro- and macroevolution of sexual dimorphism in immunity. *BMC Biology*, *19*(1),
- 572 114. <https://doi.org/10.1186/s12915-021-01049-6>
- 573 Bates, D., Mächler, M., Bolker, B., & Walker, S. (2015). Fitting Linear Mixed-Effects Models Using
- 574 lme4. *Journal of Statistical Software*, *67*(1), 1–48. <https://doi.org/10.18637/jss.v067.i01>
- 575 Bathiany, S., Dakos, V., Scheffer, M., & Lenton, T. M. (2018). Climate models predict increasing
- 576 temperature variability in poor countries. *Science Advances*, *4*(5), eaar5809.
- 577 <https://doi.org/10.1126/sciadv.aar5809>
- 578 Baur, J., & Berger, D. (2020). Experimental evidence for effects of sexual selection on condition-
- 579 dependent mutation rates. *Nature Ecology & Evolution*, *4*(5), 737–744.
- 580 <https://doi.org/10.1038/s41559-020-1140-7>

- 581 Baur, J., Nsanzimana, J. d'Amour, & Berger, D. (2019). Sexual selection and the evolution of male and  
582 female cognition: A test using experimental evolution in seed beetles\*. *Evolution*, *73*(12),  
583 2390–2400. <https://doi.org/10.1111/evo.13793>
- 584 Bayram, H., Sayadi, A., Immonen, E., & Arnqvist, G. (2019). Identification of novel ejaculate proteins  
585 in a seed beetle and division of labour across male accessory reproductive glands. *Insect*  
586 *Biochemistry and Molecular Biology*, *104*, 50–57.  
587 <https://doi.org/10.1016/j.ibmb.2018.12.002>
- 588 Berger, D., Grieshop, K., Lind, M. I., Goenaga, J., Maklakov, A. A., & Arnqvist, G. (2014). Intralocus  
589 sexual conflict and environmental stress. *Evolution*, *68*(8), 2184–2196.  
590 <https://doi.org/10.1111/evo.12439>
- 591 Berger, D., Stångberg, J., Baur, J., & Walters, R. J. (2021). Elevated temperature increases genome-  
592 wide selection on de novo mutations. *Proceedings of the Royal Society B: Biological Sciences*,  
593 *288*(1944), 20203094. <https://doi.org/10.1098/rspb.2020.3094>
- 594 Berger, D., Walters, R. J., & Gotthard, K. (2008). What limits insect fecundity? Body size- and  
595 temperature-dependent egg maturation and oviposition in a butterfly. *Functional Ecology*,  
596 *22*(3), 523–529. <https://doi.org/10.1111/j.1365-2435.2008.01392.x>
- 597 Berger, D., You, T., Minano, M. R., Grieshop, K., Lind, M. I., Arnqvist, G., & Maklakov, A. A. (2016).  
598 Sexually antagonistic selection on genetic variation underlying both male and female same-  
599 sex sexual behavior. *BMC Evolutionary Biology*, *16*(1), 88. [https://doi.org/10.1186/s12862-](https://doi.org/10.1186/s12862-016-0658-4)  
600 [016-0658-4](https://doi.org/10.1186/s12862-016-0658-4)
- 601 Bolnick, D. I., Amarasekare, P., Araújo, M. S., Bürger, R., Levine, J. M., Novak, M., Rudolf, V. H. W.,  
602 Schreiber, S. J., Urban, M. C., & Vasseur, D. A. (2011). Why intraspecific trait variation  
603 matters in community ecology. *Trends in Ecology & Evolution*, *26*(4), 183–192.  
604 <https://doi.org/10.1016/j.tree.2011.01.009>
- 605 Brady, S. P., Bolnick, D. I., Angert, A. L., Gonzalez, A., Barrett, R. D. H., Crispo, E., Derry, A. M., Eckert,  
606 C. G., Fraser, D. J., Fussmann, G. F., Guichard, F., Lamy, T., McAdam, A. G., Newman, A. E. M.,

- 607 Paccard, A., Rolshausen, G., Simons, A. M., & Hendry, A. P. (2019). Causes of maladaptation.  
608 *Evolutionary Applications*, 12(7), 1229–1242. <https://doi.org/10.1111/eva.12844>
- 609 Bublly, O. A., Kristensen, T. N., Kellermann, V., & Loeschcke, V. (2012). Humidity affects genetic  
610 architecture of heat resistance in *Drosophila melanogaster*. *Journal of Evolutionary Biology*,  
611 25(6), 1180–1188. <https://doi.org/10.1111/j.1420-9101.2012.02506.x>
- 612 Casanueva, M. O., Burga, A., & Lehner, B. (2012). Fitness trade-offs and environmentally induced  
613 mutation buffering in isogenic *C. elegans*. *Science (New York, N.Y.)*, 335(6064), 82–85.  
614 <https://doi.org/10.1126/science.1213491>
- 615 Caswell, H. (2006). Matrix Population Models. In *Encyclopedia of Environmetrics*. American Cancer  
616 Society. <https://doi.org/10.1002/9780470057339.vam006m>
- 617 Chenoweth, S. F., Appleton, N. C., Allen, S. L., & Rundle, H. D. (2015). Genomic Evidence that Sexual  
618 Selection Impedes Adaptation to a Novel Environment. *Current Biology*, 25(14), 1860–1866.  
619 <https://doi.org/10.1016/j.cub.2015.05.034>
- 620 Chevin, L.-M., Collins, S., & Lefèvre, F. (2013). Phenotypic plasticity and evolutionary demographic  
621 responses to climate change: Taking theory out to the field. *Functional Ecology*, 27(4), 967–  
622 979. <https://doi.org/10.1111/j.1365-2435.2012.02043.x>
- 623 Chevrier, C., Nguyen, T. M., & Bressac, C. (2019). Heat shock sensitivity of adult male fertility in the  
624 parasitoid wasp *Anisopteromalus calandrae* (Hymenoptera, Pteromalidae). *Journal of*  
625 *Thermal Biology*, 85, 102419. <https://doi.org/10.1016/j.jtherbio.2019.102419>
- 626 Chirault, M., Lucas, C., Goubault, M., Chevrier, C., Bressac, C., & Lécureuil, C. (2015). A Combined  
627 Approach to Heat Stress Effect on Male Fertility in *Nasonia vitripennis*: From the  
628 Physiological Consequences on Spermatogenesis to the Reproductive Adjustment of Females  
629 Mated with Stressed Males. *PLOS ONE*, 10(3), e0120656.  
630 <https://doi.org/10.1371/journal.pone.0120656>

- 631 Chirgwin, E., Connallon, T., & Monro, K. (2021). The thermal environment at fertilization mediates  
632 adaptive potential in the sea. *Evolution Letters*, 5(2), 154–163.  
633 <https://doi.org/10.1002/evl3.215>
- 634 Crudgington, H. S., & Siva-Jothy, M. T. (2000). Genital damage, kicking and early death. *Nature*,  
635 407(6806), 855–856. <https://doi.org/10.1038/35038154>
- 636 Dall, S. R. X., Bell, A. M., Bolnick, D. I., & Ratnieks, F. L. W. (2012). An evolutionary ecology of  
637 individual differences. *Ecology Letters*, 15(10), 1189–1198. [https://doi.org/10.1111/j.1461-](https://doi.org/10.1111/j.1461-0248.2012.01846.x)  
638 0248.2012.01846.x
- 639 David, J. R., Araripe, L. O., Chakir, M., Legout, H., Lemos, B., Pétavy, G., Rohmer, C., Joly, D., &  
640 Moreteau, B. (2005). Male sterility at extreme temperatures: A significant but neglected  
641 phenomenon for understanding *Drosophila* climatic adaptations. *Journal of Evolutionary*  
642 *Biology*, 18(4), 838–846. <https://doi.org/10.1111/j.1420-9101.2005.00914.x>
- 643 Degioanni, A., Bonenfant, C., Cabut, S., & Condemi, S. (2019). Living on the edge: Was demographic  
644 weakness the cause of Neanderthal demise? *PLOS ONE*, 14(5), e0216742.  
645 <https://doi.org/10.1371/journal.pone.0216742>
- 646 Dell, A. I., Pawar, S., & Savage, V. M. (2011). Systematic variation in the temperature dependence of  
647 physiological and ecological traits. *Proceedings of the National Academy of Sciences*,  
648 108(26), 10591–10596. <https://doi.org/10.1073/pnas.1015178108>
- 649 Deutsch, C. A., Tewksbury, J. J., Huey, R. B., Sheldon, K. S., Ghalambor, C. K., Haak, D. C., & Martin, P.  
650 R. (2008). Impacts of climate warming on terrestrial ectotherms across latitude. *Proceedings*  
651 *of the National Academy of Sciences*, 105(18), 6668–6672.  
652 <https://doi.org/10.1073/pnas.0709472105>
- 653 Deutscher Wetterdienst. (n.d.). *Klimatafel von Lomé (Flugh.) / Togo*. Retrieved 11 March 2021, from  
654 [https://www.dwd.de/DWD/klima/beratung/ak/ak\\_653870\\_kt.pdf](https://www.dwd.de/DWD/klima/beratung/ak/ak_653870_kt.pdf)
- 655 Dougherty, L. R., van Lieshout, E., McNamara, K. B., Moschilla, J. A., Arnqvist, G., & Simmons, L. W.  
656 (2017). Sexual conflict and correlated evolution between male persistence and female

- 657 resistance traits in the seed beetle *Callosobruchus maculatus*. *Proceedings of the Royal*  
658 *Society B: Biological Sciences*, 284(1855), 20170132. <https://doi.org/10.1098/rspb.2017.0132>
- 659 Dowling, D. K., & Simmons, L. W. (2009). Reactive oxygen species as universal constraints in life-  
660 history evolution. *Proceedings of the Royal Society B: Biological Sciences*, 276(1663), 1737–  
661 1745. <https://doi.org/10.1098/rspb.2008.1791>
- 662 Eady, P. E. (1995). Why Do Male *Callosobruchus maculatus* Beetles Inseminate so Many Sperm?  
663 *Behavioral Ecology and Sociobiology*, 36(1), 25–32.
- 664 Edvardsson, M., & Tregenza, T. (2005). Why do male *Callosobruchus maculatus* harm their mates?  
665 *Behavioral Ecology*, 16(4), 788–793. <https://doi.org/10.1093/beheco/ari055>
- 666 Evans, R. K., Toews, M. D., & Sial, A. A. (2018). Impact of short- and long-term heat stress on  
667 reproductive potential of *Drosophila suzukii* Matsumura (Diptera: Drosophilidae). *Journal of*  
668 *Thermal Biology*, 78, 92–99. <https://doi.org/10.1016/j.jtherbio.2018.09.011>
- 669 Feder, M. E., Bennett, A. F., & Huey, R. B. (2000). Evolutionary Physiology. *Annual Review of Ecology*  
670 *and Systematics*, 31(1), 315–341. <https://doi.org/10.1146/annurev.ecolsys.31.1.315>
- 671 Fox, C. W. (1993). Multiple Mating, Lifetime Fecundity and Female Mortality of the Bruchid Beetle,  
672 *Callosobruchus maculatus* (Coleoptera: Bruchidae). *Functional Ecology*, 7(2), 203–208.  
673 <https://doi.org/10.2307/2389888>
- 674 Fox, C. W., Stillwell, R. C., Wallin, W. G., & Hitchcock, L. J. (2006). Temperature and host species  
675 affect nuptial gift size in a seed-feeding beetle. *Functional Ecology*, 20(6), 1003–1011.  
676 <https://doi.org/10.1111/j.1365-2435.2006.01197.x>
- 677 Fox, J., & Weisberg, S. (2019). *An R Companion to Applied Regression* (Third). Sage.  
678 <https://socialsciences.mcmaster.ca/jfox/Books/Companion/>
- 679 Frazier, M. R., Huey, R. B., & Berrigan, D. (2006). Thermodynamics Constrains the Evolution of Insect  
680 Population Growth Rates: “Warmer Is Better.” *The American Naturalist*, 168(4), 512–520.  
681 <https://doi.org/10.1086/506977>



- 682 Gage, M. J. G., Macfarlane, C. P., Yeates, S., Ward, R. G., Searle, J. B., & Parker, G. A. (2004).  
683 Spermatozoal Traits and Sperm Competition in Atlantic Salmon: Relative Sperm Velocity Is  
684 the Primary Determinant of Fertilization Success. *Current Biology*, *14*(1), 44–47.  
685 <https://doi.org/10.1016/j.cub.2003.12.028>
- 686 García-Roa, R., Chirinos, V., & Carazo, P. (2019). The ecology of sexual conflict: Temperature  
687 variation in the social environment can drastically modulate male harm to females.  
688 *Functional Ecology*, *33*(4), 681–692. <https://doi.org/10.1111/1365-2435.13275>
- 689 García-Roa, R., Garcia-Gonzalez, F., Noble, D. W. A., & Carazo, P. (2020). Temperature as a modulator  
690 of sexual selection. *Biological Reviews*, *95*(6), 1607–1629. <https://doi.org/10.1111/brv.12632>
- 691 Gay, L., Hosken, D. J., Vasudeva, R., Tregenza, T., & Eady, P. E. (2009). Sperm competition and  
692 maternal effects differentially influence testis and sperm size in *Callosobruchus maculatus*.  
693 *Journal of Evolutionary Biology*, *22*(5), 1143–1150. [https://doi.org/10.1111/j.1420-](https://doi.org/10.1111/j.1420-9101.2009.01724.x)  
694 [9101.2009.01724.x](https://doi.org/10.1111/j.1420-9101.2009.01724.x)
- 695 Gerking, S. D., & Lee, R. M. (1983). Thermal Limits for Growth and Reproduction in the Desert  
696 Pupfish *Cyprinodon n. Nevadensis*. *Physiological Zoology*, *56*(1), 1–9. JSTOR.
- 697 Godwin, J. L., Lumley, A. J., Michalczyk, Ł., Martin, O. Y., & Gage, M. J. G. (2020). Mating patterns  
698 influence vulnerability to the extinction vortex. *Global Change Biology*, *26*(8), 4226–4239.  
699 <https://doi.org/10.1111/gcb.15186>
- 700 Gomez-Llano, M. A., Bensch, H. M., & Svensson, E. I. (2018). Sexual conflict and ecology: Species  
701 composition and male density interact to reduce male mating harassment and increase  
702 female survival. *Evolution*, *72*(4), 906–915. <https://doi.org/10.1111/evo.13457>
- 703 Gómez-Llano, M., Scott, E., & Svensson, E. I. (2020). The importance of pre- and postcopulatory  
704 sexual selection promoting adaptation to increasing temperatures. *Current Zoology*,  
705 *zoaa059*. <https://doi.org/10.1093/cz/zoaa059>
- 706 Grieshop, K., Maurizio, P. L., Arnqvist, G., & Berger, D. (2020). Selection in males purges the standing  
707 genetic load on female fitness. *BioRxiv*. <https://doi.org/10.1101/2020.07.20.213132>

- 708 Grieshop, K., Stångberg, J., Martinossi-Allibert, I., Arnqvist, G., & Berger, D. (2016). Strong sexual  
709 selection in males against a mutation load that reduces offspring production in seed beetles.  
710 *Journal of Evolutionary Biology*, 29(6), 1201–1210. <https://doi.org/10.1111/jeb.12862>
- 711 Hansen, P. J. (2009). Effects of heat stress on mammalian reproduction. *Philosophical Transactions of*  
712 *the Royal Society B: Biological Sciences*, 364(1534), 3341–3350.  
713 <https://doi.org/10.1098/rstb.2009.0131>
- 714 Haren, M. M. V., Rönn, J. L., Schilthuizen, M., & Arnqvist, G. (2017). Postmating sexual selection and  
715 the enigmatic jawed genitalia of *Callosobruchus subinnotatus*. *Biology Open*, 6(7), 1008–  
716 1012. <https://doi.org/10.1242/bio.025684>
- 717 Helfenstein, F., Losdat, S., Møller, A. P., Blount, J. D., & Richner, H. (2010). Sperm of colourful males  
718 are better protected against oxidative stress. *Ecology Letters*, 13(2), 213–222.  
719 <https://doi.org/10.1111/j.1461-0248.2009.01419.x>
- 720 Hoffmann, A. A. (2010). Physiological climatic limits in *Drosophila*: Patterns and implications. *Journal*  
721 *of Experimental Biology*, 213(6), 870–880. <https://doi.org/10.1242/jeb.037630>
- 722 Hoffmann, A. A., Chown, S. L., & Clusella-Trullas, S. (2013). Upper thermal limits in terrestrial  
723 ectotherms: How constrained are they? *Functional Ecology*, 27(4), 934–949.  
724 <https://doi.org/10.1111/j.1365-2435.2012.02036.x>
- 725 Hoffmann, A. A., & Sgrò, C. M. (2011). Climate change and evolutionary adaptation. *Nature*,  
726 470(7335), 479–485. <https://doi.org/10.1038/nature09670>
- 727 Hosken, D. J., Garner, T. W. J., Tregenza, T., Wedell, N., & Ward, P. I. (2003). Superior sperm  
728 competitors sire higher-quality young. *Proceedings of the Royal Society of London. Series B:*  
729 *Biological Sciences*, 270(1527), 1933–1938. <https://doi.org/10.1098/rspb.2003.2443>
- 730 Hotzy, C., & Arnqvist, G. (2009). Sperm Competition Favors Harmful Males in Seed Beetles. *Current*  
731 *Biology*, 19(5), 404–407. <https://doi.org/10.1016/j.cub.2009.01.045>
- 732 Iossa, G. (2019). Sex-Specific Differences in Thermal Fertility Limits. *Trends in Ecology & Evolution*,  
733 34(6), 490–492. <https://doi.org/10.1016/j.tree.2019.02.016>

- 734 Janowitz, S. A., & Fischer, K. (2011). Opposing effects of heat stress on male versus female  
735 reproductive success in *Bicyclus anynana* butterflies. *Journal of Thermal Biology*, *36*(5), 283–  
736 287. <https://doi.org/10.1016/j.jtherbio.2011.04.001>
- 737 Johnson, N. C., Xie, S.-P., Kosaka, Y., & Li, X. (2018). Increasing occurrence of cold and warm  
738 extremes during the recent global warming slowdown. *Nature Communications*, *9*(1), 1724.  
739 <https://doi.org/10.1038/s41467-018-04040-y>
- 740 Jørgensen, K. T., Sørensen, J. G., & Bundgaard, J. (2006). Heat tolerance and the effect of mild heat  
741 stress on reproductive characters in *Drosophila buzzatii* males. *Journal of Thermal Biology*,  
742 *31*(3), 280–286. <https://doi.org/10.1016/j.jtherbio.2005.11.026>
- 743 Karlsson, B., Leimar, O., & Wiklund, C. (1997). Unpredictable environments, nuptial gifts and the  
744 evolution of sexual size dimorphism in insects: An experiment. *Proceedings of the Royal*  
745 *Society of London. Series B: Biological Sciences*, *264*(1381), 475–479.  
746 <https://doi.org/10.1098/rspb.1997.0068>
- 747 Kellermann, V., & Heerwaarden, B. van. (2019). Terrestrial insects and climate change: Adaptive  
748 responses in key traits. *Physiological Entomology*, *44*(2), 99–115.  
749 <https://doi.org/10.1111/phen.12282>
- 750 Kingsolver, J. G., & Huey, R. B. (2008). Size, temperature, and fitness: Three rules. *Evolutionary*  
751 *Ecology Research*, *10*(2), 251–268.
- 752 Kirk Green, C., Moore, P. J., & Sial, A. A. (2019). Impact of heat stress on development and fertility of  
753 *Drosophila suzukii* Matsumura (Diptera: Drosophilidae). *Journal of Insect Physiology*, *114*,  
754 45–52. <https://doi.org/10.1016/j.jinsphys.2019.02.008>
- 755 Kodric-Brown, A., & Brown, J. H. (1987). Anisogamy, sexual selection, and the evolution and  
756 maintenance of sex. *Evolutionary Ecology*, *1*(2), 95–105.  
757 <https://doi.org/10.1007/BF02067393>

- 758 Krebs, R. A., & Loeschcke, V. (1994). Effects of exposure to short-term heat stress on fitness  
759 components in *Drosophila melanogaster*. *Journal of Evolutionary Biology*, 7(1), 39–49.  
760 <https://doi.org/10.1046/j.1420-9101.1994.7010039.x>
- 761 Lenth, R. (2020). *emmeans: Estimated Marginal Means, aka Least-Squares Means*. [https://CRAN.R-](https://CRAN.R-project.org/package=emmeans)  
762 [project.org/package=emmeans](https://CRAN.R-project.org/package=emmeans)
- 763 Loisel, A., Isla, A., & Daufresne, M. (2019). Variation of thermal plasticity in growth and reproduction  
764 patterns: Importance of ancestral and developmental temperatures. *Journal of Thermal*  
765 *Biology*, 84, 460–468. <https://doi.org/10.1016/j.jtherbio.2019.07.029>
- 766 Lutterschmidt, W. I., & Hutchison, V. H. (1997). The critical thermal maximum: History and critique.  
767 *Canadian Journal of Zoology*, 75(10), 1561–1574. <https://doi.org/10.1139/z97-783>
- 768 MacPherson, A., Yun, L., Barrera, T. S., Agrawal, A. F., & Rundle, H. D. (2018). The effects of male  
769 harm vary with female quality and environmental complexity in *Drosophila melanogaster*.  
770 *Biology Letters*, 14(8), 20180443. <https://doi.org/10.1098/rsbl.2018.0443>
- 771 Mahroof, R., Subramanyam, B., & Flinn, P. (2005). Reproductive Performance of *Tribolium*  
772 *castaneum* (Coleoptera: Tenebrionidae) Exposed to the Minimum Heat Treatment  
773 Temperature as Pupae and Adults. *Journal of Economic Entomology*, 98(2), 626–633.  
774 <https://doi.org/10.1093/jee/98.2.626>
- 775 Manning, J. T. (1984). Males and the advantage of sex. *Journal of Theoretical Biology*, 108(2), 215–  
776 220. [https://doi.org/10.1016/S0022-5193\(84\)80067-3](https://doi.org/10.1016/S0022-5193(84)80067-3)
- 777 Martinossi-Allibert, I., Rueffler, C., Arnqvist, G., & Berger, D. (2019). The efficacy of good genes  
778 sexual selection under environmental change. *Proceedings of the Royal Society B: Biological*  
779 *Sciences*, 286(1896), 20182313. <https://doi.org/10.1098/rspb.2018.2313>
- 780 Martinossi-Allibert, I., Thilliez, E., Arnqvist, G., & Berger, D. (2019). Sexual selection, environmental  
781 robustness, and evolutionary demography of maladapted populations: A test using  
782 experimental evolution in seed beetles. *Evolutionary Applications*, 12(7), 1371–1384.  
783 <https://doi.org/10.1111/eva.12758>

- 784 McNamara, K. B., van Lieshout, E., & Simmons, L. W. (2014). A test of the sexy-sperm and good-  
785 sperm hypotheses for the evolution of polyandry. *Behavioral Ecology*, *25*(4), 989–995.  
786 <https://doi.org/10.1093/beheco/aru067>
- 787 Mironidis, G. K., & Savopoulou-Soultani, M. (2010). Effects of heat shock on survival and  
788 reproduction of *Helicoverpa armigera* (Lepidoptera: Noctuidae) adults. *Journal of Thermal*  
789 *Biology*, *35*(2), 59–69. <https://doi.org/10.1016/j.jtherbio.2009.11.001>
- 790 Nguyen, T. M., Bressac, C., & Chevrier, C. (2013). Heat stress affects male reproduction in a  
791 parasitoid wasp. *Journal of Insect Physiology*, *59*(3), 248–254.  
792 <https://doi.org/10.1016/j.jinsphys.2012.12.001>
- 793 Oku, K., Price, T. A. R., & Wedell, N. (2019). Does mating negatively affect female immune defences  
794 in insects? *Animal Biology*, *69*(1), 117–136. <https://doi.org/10.1163/15707563-20191082>
- 795 Parker, G. A. (2006). Sexual conflict over mating and fertilization: An overview. *Philosophical*  
796 *Transactions of the Royal Society B: Biological Sciences*, *361*(1466), 235–259.  
797 <https://doi.org/10.1098/rstb.2005.1785>
- 798 Parratt, S. R., Walsh, B. S., Metelmann, S., White, N., Manser, A., Bretman, A. J., Hoffmann, A. A.,  
799 Snook, R. R., & Price, T. A. R. (2021). Temperatures that sterilize males better match global  
800 species distributions than lethal temperatures. *Nature Climate Change*, 1–4.  
801 <https://doi.org/10.1038/s41558-021-01047-0>
- 802 Pilakouta, N., & Ålund, M. (2021). Sexual selection and environmental change: What do we know  
803 and what comes next? *Current Zoology*, *zoab021*. <https://doi.org/10.1093/cz/zoab021>
- 804 Piyaphongkul, J., Pritchard, J., & Bale, J. (2012). Can Tropical Insects Stand the Heat? A Case Study  
805 with the Brown Planthopper *Nilaparvata lugens* (Stål). *PLOS ONE*, *7*(1), e29409.  
806 <https://doi.org/10.1371/journal.pone.0029409>
- 807 Plesnar-Bielak, A., Skrzynecka, A. M., Prokop, Z. M., & Radwan, J. (2012). Mating system affects  
808 population performance and extinction risk under environmental challenge. *Proceedings of*

- 809            *the Royal Society B: Biological Sciences*, 279(1747), 4661–4667.
- 810            <https://doi.org/10.1098/rspb.2012.1867>
- 811 Porcelli, D., Gaston, K. J., Butlin, R. K., & Snook, R. R. (2017). Local adaptation of reproductive  
812 performance during thermal stress. *Journal of Evolutionary Biology*, 30(2), 422–429.  
813            <https://doi.org/10.1111/jeb.13018>
- 814 R Core Team. (2020). *R: A Language and Environment for Statistical Computing*. R Foundation for  
815 Statistical Computing. <https://www.R-project.org/>
- 816 Rankin, D. J., Dieckmann, U., & Kokko, H. (2011). Sexual Conflict and the Tragedy of the Commons.  
817            *The American Naturalist*, 177(6), 780–791. <https://doi.org/10.1086/659947>
- 818 Rankin, D. J., & López-Sepulcre, A. (2005). Can adaptation lead to extinction? *Oikos*, 111(3), 616–619.  
819            <https://doi.org/10.1111/j.1600-0706.2005.14541.x>
- 820 Reinhardt, K., Naylor, R. A., & Siva-Jothy, M. T. (2009). Ejaculate components delay reproductive  
821 senescence while elevating female reproductive rate in an insect. *Proceedings of the*  
822 *National Academy of Sciences*, 106(51), 21743–21747.  
823            <https://doi.org/10.1073/pnas.0905347106>
- 824 Rinehart, J. P., Yocum, G. D., & Denlinger, D. L. (2000). Thermotolerance and rapid cold hardening  
825 ameliorate the negative effects of brief exposures to high or low temperatures on fecundity  
826 in the flesh fly, *Sarcophaga crassipalpis*. *Physiological Entomology*, 25(4), 330–336.  
827            <https://doi.org/10.1111/j.1365-3032.2000.00201.x>
- 828 Rönn, J. L., & Hotzy, C. (2012). Do longer genital spines in male seed beetles function as better  
829 anchors during mating? *Animal Behaviour*, 83(1), 75–79.
- 830 Rönn, J. L., Katvala, M., & Arnqvist, G. (2006). The costs of mating and egg production in  
831 *Callosobruchus* seed beetles. *Animal Behaviour*, 72(2), 335–342.
- 832 Rönn, J. L., Katvala, M., & Arnqvist, G. (2007). Coevolution between harmful male genitalia and  
833 female resistance in seed beetles. *Proceedings of the National Academy of Sciences*, 104(26),  
834 10921–10925.

- 835 Rönn, J. L., Katvala, M., & Arnqvist, G. (2008). Interspecific variation in ejaculate allocation and  
836 associated effects on female fitness in seed beetles. *Journal of Evolutionary Biology*, 21(2),  
837 461–470. <https://doi.org/10.1111/j.1420-9101.2007.01493.x>
- 838 Roux, O., Le Lann, C., van Alphen, J. J. M., & van Baaren, J. (2010). How does heat shock affect the  
839 life history traits of adults and progeny of the aphid parasitoid *Aphidius avenae*  
840 (Hymenoptera: Aphidiidae)? *Bulletin of Entomological Research*, 100(5), 543–549.  
841 <https://doi.org/10.1017/S0007485309990575>
- 842 Rowe, L., & Houle, D. (1996). The lek paradox and the capture of genetic variance by condition  
843 dependent traits. *Proceedings of the Royal Society of London. Series B: Biological Sciences*,  
844 263(1375), 1415–1421. <https://doi.org/10.1098/rspb.1996.0207>
- 845 Sales, K., Vasudeva, R., Dickinson, M. E., Godwin, J. L., Lumley, A. J., Michalczyk, Ł., Hebberecht, L.,  
846 Thomas, P., Franco, A., & Gage, M. J. G. (2018). Experimental heatwaves compromise sperm  
847 function and cause transgenerational damage in a model insect. *Nature Communications*,  
848 9(1), 4771. <https://doi.org/10.1038/s41467-018-07273-z>
- 849 Sales, K., Vasudeva, R., & Gage, M. J. G. (2021). Fertility and mortality impacts of thermal stress from  
850 experimental heatwaves on different life stages and their recovery in a model insect. *Royal*  
851 *Society Open Science*, 8(3), 201717. <https://doi.org/10.1098/rsos.201717>
- 852 Savalli, U. M., & Fox, C. W. (1999). The effect of male mating history on paternal investment,  
853 fecundity and female remating in the seed beetle *Callosobruchus maculatus*. *Functional*  
854 *Ecology*, 13(2), 169–177. <https://doi.org/10.1046/j.1365-2435.1999.00287.x>
- 855 Silva, W. T. A. F., Sáez-Espinosa, P., Torijo-Boix, S., Romero, A., Devaux, C., Durieux, M.,  
856 Gómez-Torres, M. J., & Immler, S. (2019). The effects of male social environment on sperm  
857 phenotype and genome integrity. *Journal of Evolutionary Biology*, 32(6), 535–544.  
858 <https://doi.org/10.1111/jeb.13435>

- 859 Svensson, E. I., & Connallon, T. (2019). How frequency-dependent selection affects population  
860 fitness, maladaptation and evolutionary rescue. *Evolutionary Applications*, 12(7), 1243–  
861 1258. <https://doi.org/10.1111/eva.12714>
- 862 Svensson, E. I., Gómez-Llano, M., & Waller, J. T. (2020). Selection on phenotypic plasticity favors  
863 thermal canalization. *Proceedings of the National Academy of Sciences*, 117(47), 29767–  
864 29774. <https://doi.org/10.1073/pnas.2012454117>
- 865 Terblanche, J. S., Deere, J. A., Clusella-Trullas, S., Janion, C., & Chown, S. L. (2007). Critical thermal  
866 limits depend on methodological context. *Proceedings of the Royal Society B: Biological  
867 Sciences*, 274(1628), 2935–2943. <https://doi.org/10.1098/rspb.2007.0985>
- 868 Tomkins, J. L., Radwan, J., Kotiaho, J. S., & Tregenza, T. (2004). Genic capture and resolving the lek  
869 paradox. *Trends in Ecology & Evolution*, 19(6), 323–328.  
870 <https://doi.org/10.1016/j.tree.2004.03.029>
- 871 van Heerwaarden, B., & Sgrò, C. M. (2021). Male fertility thermal limits predict vulnerability to  
872 climate warming. *Nature Communications*, 12(1), 2214. [https://doi.org/10.1038/s41467-  
873 021-22546-w](https://doi.org/10.1038/s41467-021-22546-w)
- 874 Varela, R., Rodríguez-Díaz, L., & deCastro, M. (2020). Persistent heat waves projected for Middle East  
875 and North Africa by the end of the 21st century. *PLOS ONE*, 15(11), e0242477.  
876 <https://doi.org/10.1371/journal.pone.0242477>
- 877 Vasudeva, R., Deeming, D. C., & Eady, P. E. (2014). Developmental temperature affects the  
878 expression of ejaculatory traits and the outcome of sperm competition in *Callosobruchus  
879 maculatus*. *Journal of Evolutionary Biology*, 27(9), 1811–1818.  
880 <https://doi.org/10.1111/jeb.12431>
- 881 Vasudeva, R., Deeming, D. C., & Eady, P. E. (2021). Age-specific sensitivity of sperm length and testes  
882 size to developmental temperature in the bruchid beetle. *Journal of Zoology*, n/a(n/a).  
883 <https://doi.org/10.1111/jzo.12884>



- 884 Walsh, B. S., Mannion, N. L. M., Price, T. A. R., & Parratt, S. R. (2020). Sex-specific sterility caused by  
885 extreme temperatures is likely to create cryptic changes to the operational sex ratio in  
886 *Drosophila virilis*. *Current Zoology*, *zoaa067*. <https://doi.org/10.1093/cz/zoaa067>
- 887 Walsh, B. S., Parratt, S. R., Hoffmann, A. A., Atkinson, D., Snook, R. R., Bretman, A., & Price, T. A. R.  
888 (2019). The Impact of Climate Change on Fertility. *Trends in Ecology & Evolution*, *34*(3), 249–  
889 259. <https://doi.org/10.1016/j.tree.2018.12.002>
- 890 Walters, R. J., Blanckenhorn, W. U., & Berger, D. (2012). Forecasting extinction risk of ectotherms  
891 under climate warming: An evolutionary perspective. *Functional Ecology*, *26*(6), 1324–1338.  
892 <https://doi.org/10.1111/j.1365-2435.2012.02045.x>
- 893 Whitlock, M. C., & Agrawal, A. F. (2009). Purging the Genome with Sexual Selection: Reducing  
894 Mutation Load Through Selection on Males. *Evolution*, *63*(3), 569–582.  
895 <https://doi.org/10.1111/j.1558-5646.2008.00558.x>
- 896 Wickham, H. (2016). *ggplot2: Elegant Graphics for Data Analysis*. Springer-Verlag New York.  
897 <https://ggplot2.tidyverse.org>
- 898 Yamane, T., Goenaga, J., Rönn, J. L., & Arnqvist, G. (2015). Male Seminal Fluid Substances Affect  
899 Sperm Competition Success and Female Reproductive Behavior in a Seed Beetle. *PLOS ONE*,  
900 *10*(4), e0123770. <https://doi.org/10.1371/journal.pone.0123770>
- 901 Yun, L., Chen, P. J., Singh, A., Agrawal, A. F., & Rundle, H. D. (2017). The physical environment  
902 mediates male harm and its effect on selection in females. *Proceedings of the Royal Society*  
903 *B: Biological Sciences*, *284*(1858), 20170424. <https://doi.org/10.1098/rspb.2017.0424>
- 904 Zhang, W., Zhao, F., Hoffmann, A. A., & Ma, C.-S. (2013). A Single Hot Event That Does Not Affect  
905 Survival but Decreases Reproduction in the Diamondback Moth, *Plutella xylostella*. *PLOS*  
906 *ONE*, *8*(10), e75923. <https://doi.org/10.1371/journal.pone.0075923>
- 907
- 908

909 **Figure 1**

910

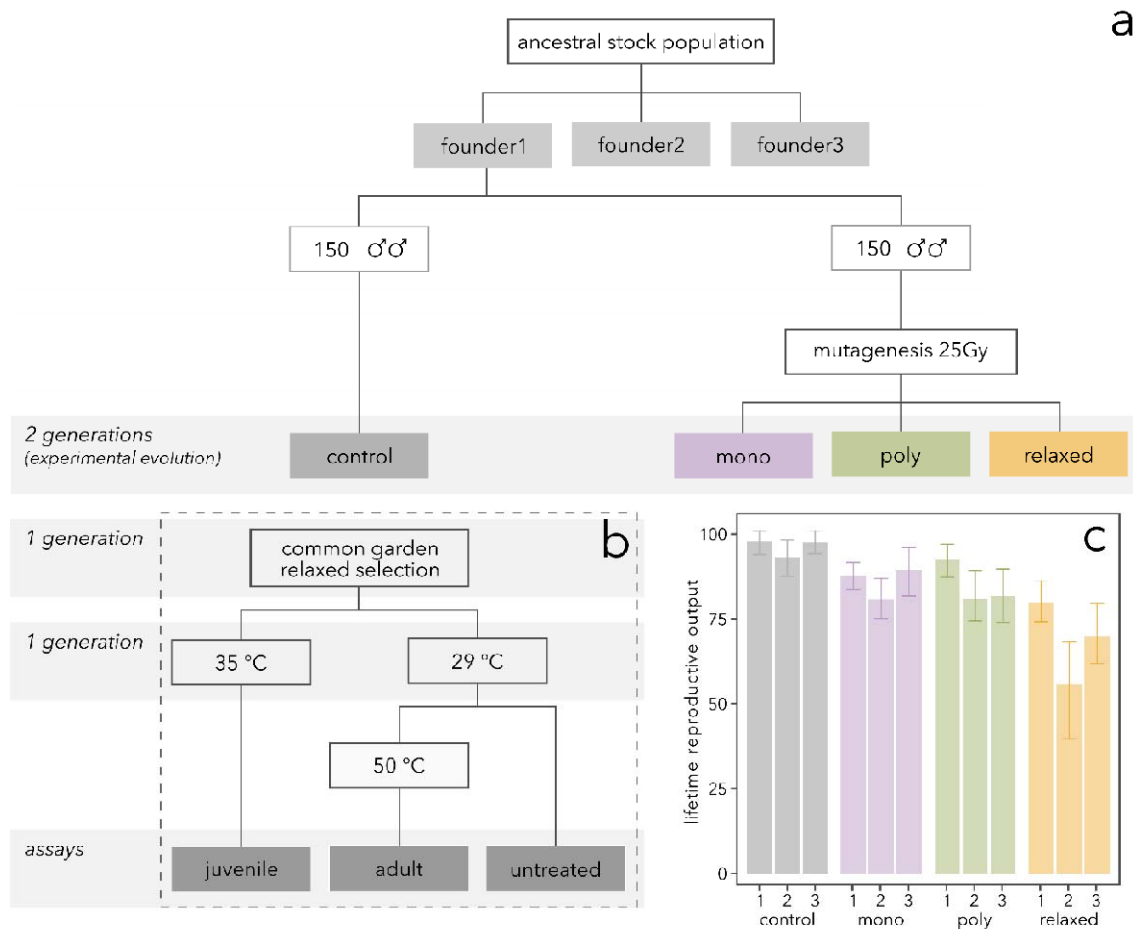

911

912 **Fig. 1:** Experimental design used to obtain the two main data sets. a) Founding populations,  
913 mutagenesis and experimental evolution. b) Juvenile heat stress (development at 35°C) and  
914 adult heat shock (20 min heat shock at 50°C) applied to all 12 populations. c) Lifetime  
915 reproductive output of all 12 populations in the benign environment (untreated). Shown are  
916 means ± 95% confidence intervals.

917

918

919

920

921

922 **Figure 2**

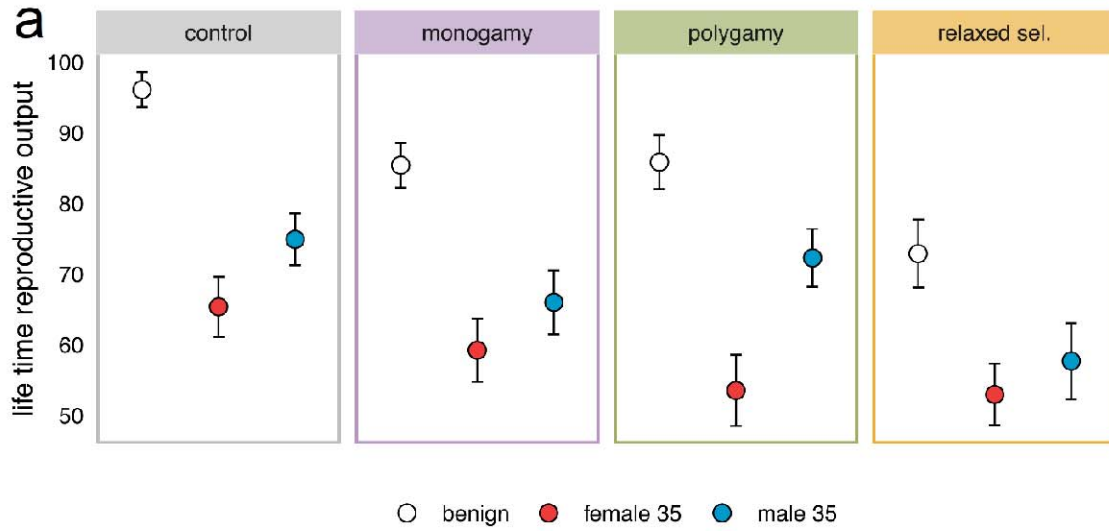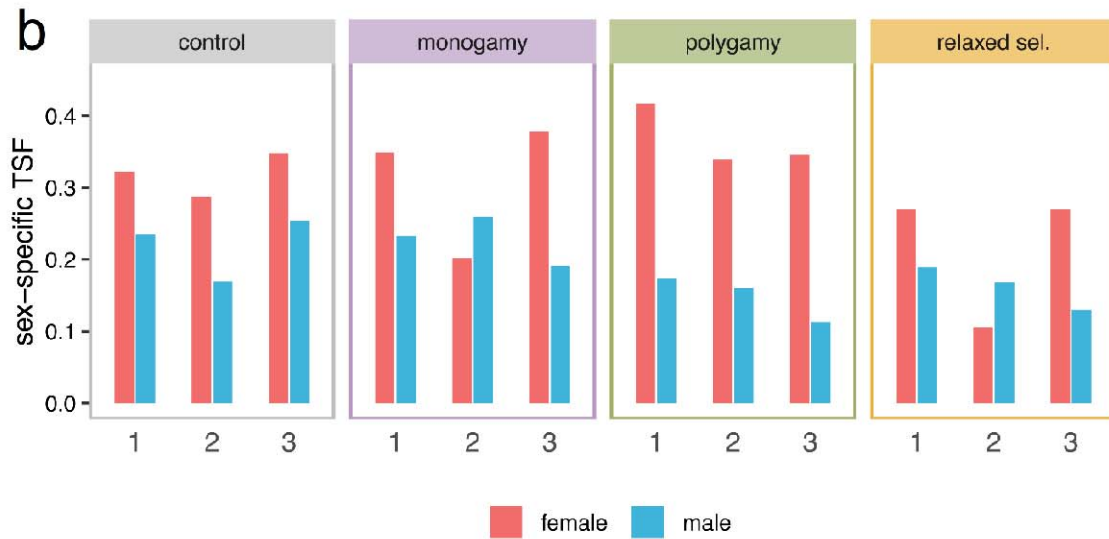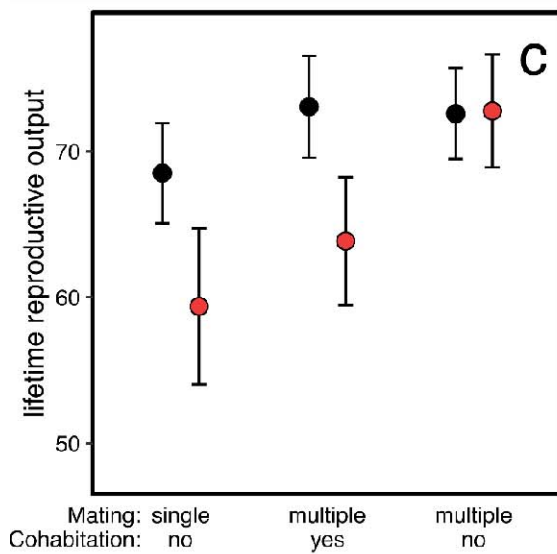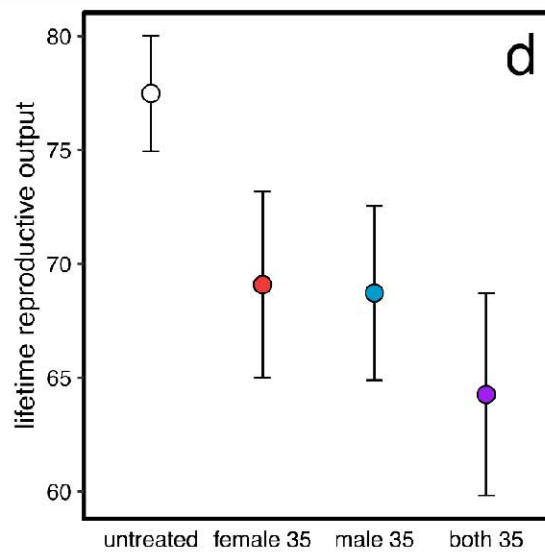

924 **Fig. 2:** Sex differences in TSF under juvenile heat stress (experiments 1.1-1.3) a) Lifetime  
925 reproductive output of couples with either the female (red symbols), the male (blue  
926 symbols), or no parent (open symbols) developing at elevated temperature. b) Relative loss  
927 in fertility (1-stressed/control) per population. Sex differences in TSF in all three blocks are  
928 greater for polygamy populations compared to all other regimes. c) Lifetime reproductive  
929 output of female beetles developing at benign (black symbols) or stressful (red symbols)  
930 temperature. d) Lifetime reproductive output of pairs in which no parent (white), the female  
931 (red), the male (blue), or both parents (purple) were exposed to juvenile heat stress. Panels  
932 a, c and d show means  $\pm$  95% confidence intervals.

933

934 **Figure 3**

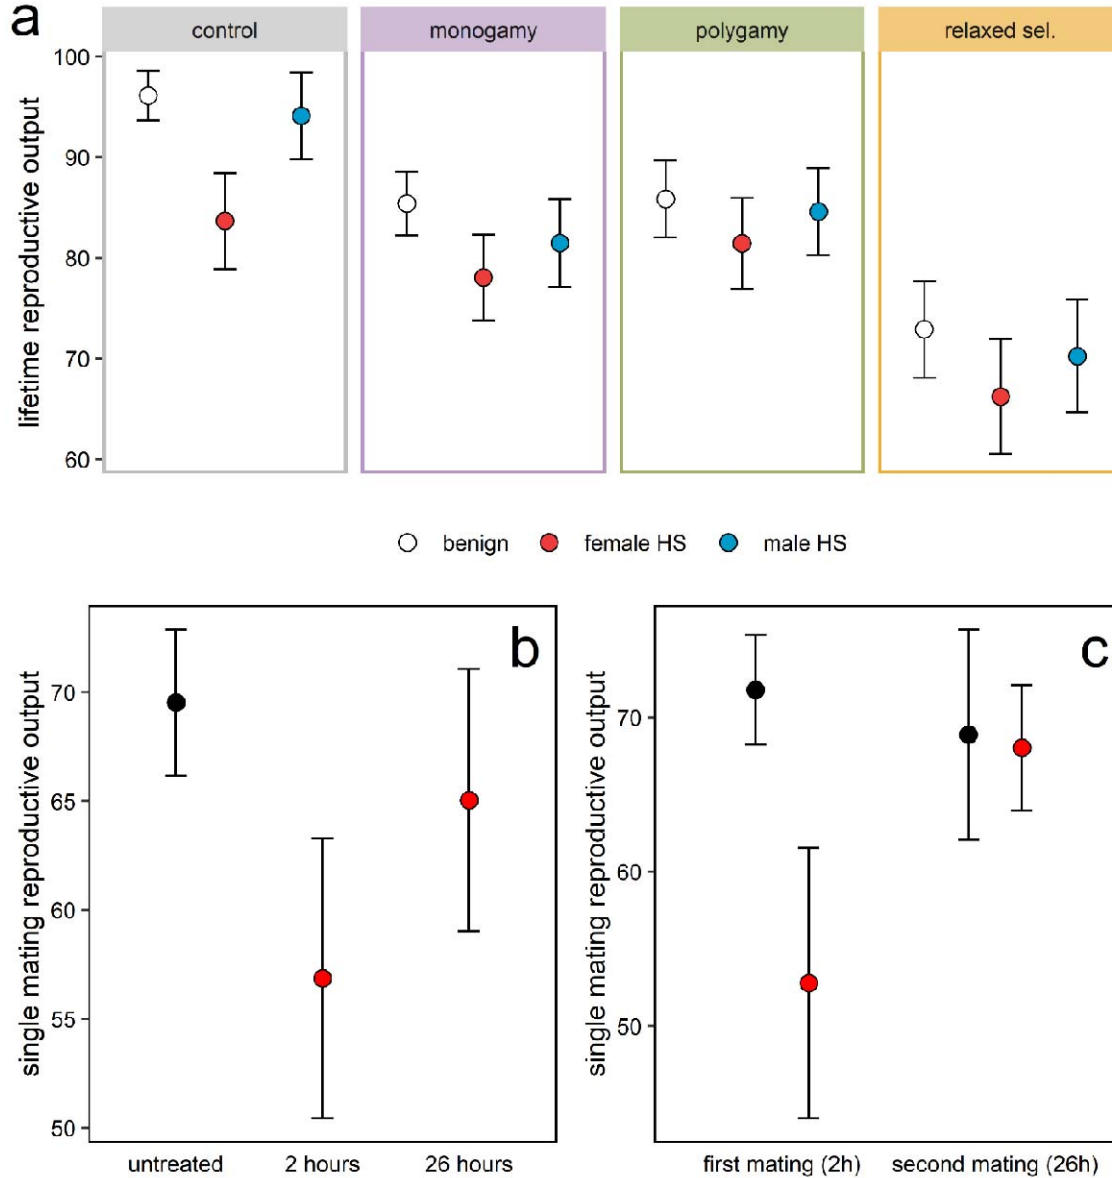

935

936

937 **Fig. 3:** Sex differences in TSF under adult heat shock (Experiments 2.1 & 2.2) a) Lifetime  
938 reproductive output depending on the sex that underwent adult heat shock (HS). b)  
939 Recovery of male fertility after adult heat shock. c) Lifetime reproductive output of  
940 untreated and heat-shocked males that were mated to a virgin female 2 hours after the  
941 treatment and again, to a second female, 26 hours after the treatment. All panels show  
942 means  $\pm$  95% confidence intervals.

943

944

945 **Figure 4**

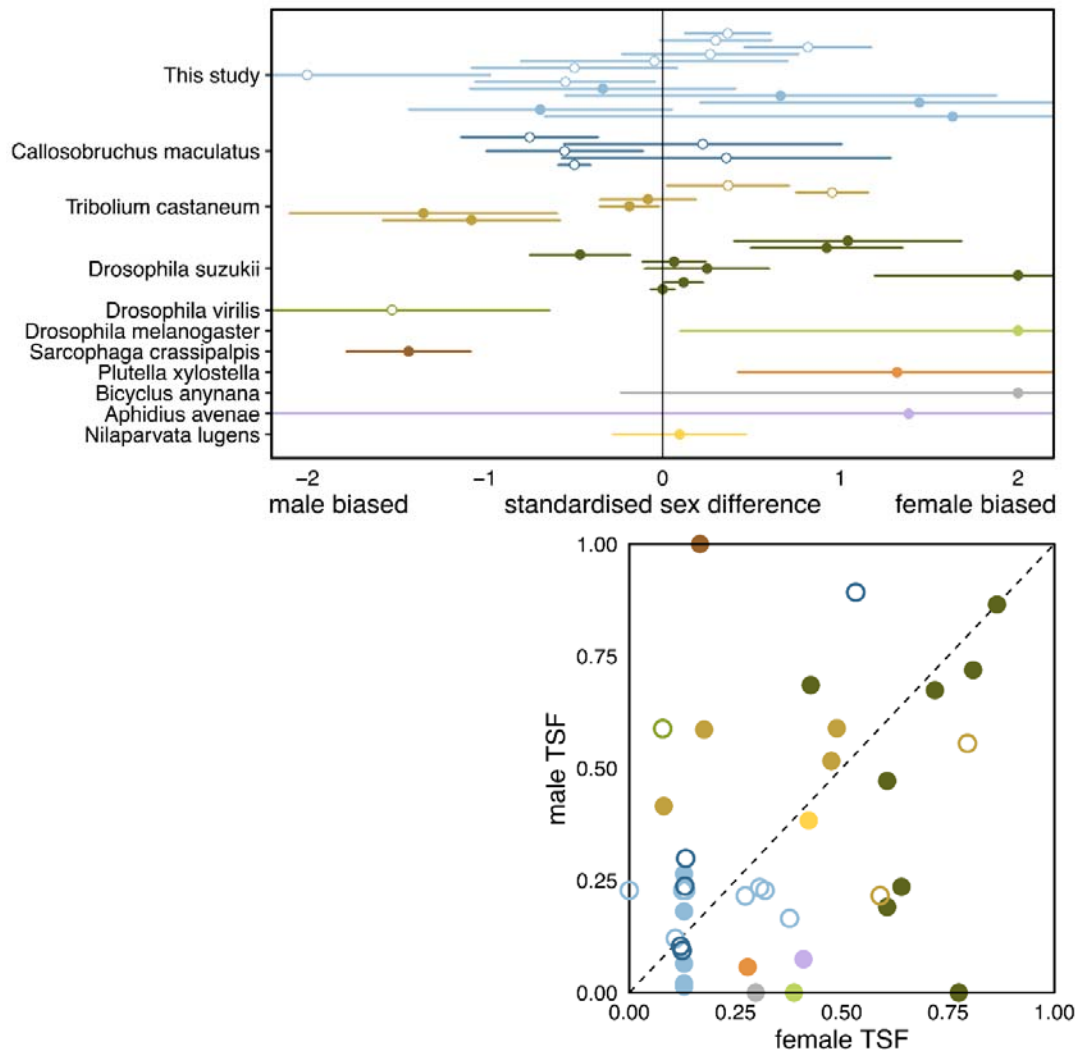

946

947 **Fig. 4:** Intraspecific variation in the sex difference in TSF generated through manipulation of  
 948 the mating system, timing of heat stress relative to (re)mating in this study, compared to  
 949 estimates from other studies on insects. Open symbols represent heat treatments applied at  
 950 a juvenile stage while symbols represent heat treatments applied during the adult stage. a)  
 951 A standardized measure of the sex difference in TSF was calculated as:  
 952 
$$SD_{TSF} = \frac{TSF_{female} - TSF_{male}}{TSF_{male} + TSF_{female}}$$
, where TSF is the relative fertility loss due to heat stress (1-

953 benign/stress). A given  $SD_{TSF}$  from this study was derived by first calculating the TSF of one  
 954 sex in a given experimental condition (e.g.  $TSF_{female}$  with remating but no cohabitation from  
 955 experiment 1.2) and then always using the TSF observed in one of the two main  
 956 experiments (1.1 for juvenile stress and 2.1 for adult stress) for the opposite sex from  
 957 control populations as comparison (e.g.  $TSF_{male}$  from experiment 1.1). 95% confidence  
 958 intervals were calculated through propagation of the uncertainty reported for measures of  
 959 reproductive output within the respective studies. b) Comparison of male and female TSF  
 960 for the studies presented in panel a). Further details, including inclusion criteria for reviewed  
 961 studies and a table of all values, are presented in Supplementary material S5 & S6.

962 **Supplementary material**

963

964 **Supplement S1:** Table of all pairwise contrasts between regimes for offspring numbers at  
 965 benign temperature.

| Contrast            | Estimate | Std.Error | z      | P-value          |
|---------------------|----------|-----------|--------|------------------|
| monogamy - control  | -0.122   | 0.045     | -2.713 | <b>0.034</b>     |
| polygamy - control  | -0.154   | 0.046     | -3.369 | <b>0.004</b>     |
| relaxed - control   | -0.392   | 0.050     | -7.778 | <b>&lt;0.001</b> |
| polygamy - monogamy | -0.032   | 0.048     | -0.675 | 0.906            |
| relaxed - monogamy  | -0.270   | 0.052     | -5.159 | <b>&lt;0.001</b> |
| relaxed - polygamy  | -0.238   | 0.053     | -4.523 | <b>&lt;0.001</b> |

966

967 **Supplement S2:** Pairwise comparisons between treatments (untreated, stressed female,  
 968 stressed male) within selection regimes for both juvenile heat stress and adult heat shock  
 969 main datasets (experiments 1.1 and 2.2). Marginal means were obtained by averaging over  
 970 blocks and experimenter. All p-values are Tukey corrected.

971

| regime   | contrast           | juvenile heat stress |       |         |                  | adult heat shock |       |         |               |
|----------|--------------------|----------------------|-------|---------|------------------|------------------|-------|---------|---------------|
|          |                    | estimate             | SE    | z.ratio | p.value          | estimate         | SE    | z.ratio | p.value       |
| control  | untreated - female | 0.467                | 0.063 | 7.407   | <b>&lt;.0001</b> | 0.239            | 0.058 | 4.148   | <b>0.0001</b> |
|          | untreated - male   | 0.269                | 0.063 | 4.258   | <b>0.0001</b>    | 0.077            | 0.058 | 1.339   | 0.373         |
|          | female - male      | -0.198               | 0.073 | -2.719  | <b>0.018</b>     | -0.162           | 0.066 | -2.447  | <b>0.038</b>  |
| monogamy | untreated - female | 0.441                | 0.067 | 6.600   | <b>&lt;.0001</b> | 0.144            | 0.063 | 2.278   | 0.059         |
|          | untreated - male   | 0.304                | 0.069 | 4.423   | <b>&lt;.0001</b> | 0.098            | 0.060 | 1.635   | 0.231         |
|          | female - male      | -0.137               | 0.078 | -1.758  | 0.184            | -0.046           | 0.070 | -0.652  | 0.791         |
| polygamy | untreated - female | 0.568                | 0.069 | 8.173   | <b>&lt;.0001</b> | 0.089            | 0.063 | 1.413   | 0.334         |
|          | untreated - male   | 0.151                | 0.068 | 2.215   | 0.069            | 0.032            | 0.062 | 0.521   | 0.861         |
|          | female - male      | -0.417               | 0.078 | -5.329  | <b>&lt;.0001</b> | -0.056           | 0.071 | -0.798  | 0.704         |
| relaxed  | untreated - female | 0.295                | 0.073 | 4.060   | <b>0.0001</b>    | 0.128            | 0.070 | 1.836   | 0.158         |
|          | untreated - male   | 0.247                | 0.074 | 3.338   | <b>0.002</b>     | 0.054            | 0.068 | 0.791   | 0.709         |
|          | female - male      | -0.048               | 0.079 | -0.616  | 0.811            | -0.074           | 0.074 | -0.999  | 0.577         |

972

973



974 **Supplement S3:** Details global model – juvenile heat stress

975

976 `glmer(offspring ~ regime*treatment + block + counter + (1|line) + (1|treatment:line) +`  
 977 `(1|familyID_female) + (1|familyID_male) + (1|OLRE_ID), family="poisson", data = data,`  
 978 `control=glmerControl(optimizer="bobyqa",optCtrl=list(maxfun=100000)))`

979 Sample size: 1719, groups: OLRE\_ID, 1719; familyID\_male, 344; familyID\_female, 341;

980 treatment:line, 36; line, 12

981

982

983 Random effects:

| Groups          | Variance | Std.Dev. |
|-----------------|----------|----------|
| OLRE_ID         | 2.94E-01 | 5.42E-01 |
| familyID_male   | 1.76E-02 | 1.33E-01 |
| familyID_female | 8.32E-03 | 9.12E-02 |
| treatment:line  | 1.32E-15 | 3.63E-08 |
| line            | 0.00E+00 | 0.00E+00 |

984

985 Fixed effects:

|                                | Estimate | Std.Err. | z      | Pr(> z )       |
|--------------------------------|----------|----------|--------|----------------|
| Intercept (ctrl, benign temp.) | 4.5983   | 0.04607  | 99.81  | <0.001         |
| regimemono                     | -0.12952 | 0.05794  | -2.235 | <b>0.02539</b> |
| regimepoly                     | -0.16538 | 0.05886  | -2.81  | <b>0.00496</b> |
| regimerelax                    | -0.41747 | 0.06406  | -6.517 | <0.001         |
| treatedFemale                  | -0.46662 | 0.06299  | -7.407 | <0.001         |
| treatedMale                    | -0.2685  | 0.06305  | -4.258 | <0.001         |
| block2                         | -0.18958 | 0.03962  | -4.785 | <0.001         |
| block3                         | -0.08568 | 0.04038  | -2.122 | <b>0.03383</b> |
| counter2                       | 0.01375  | 0.02828  | 0.486  | 0.62678        |
| regimemono:treatedFemale       | 0.02598  | 0.09176  | 0.283  | 0.77705        |
| regimepoly:treatedFemale       | -0.10092 | 0.09367  | -1.077 | 0.28127        |
| regimerelax:treatedFemale      | 0.17153  | 0.09606  | 1.786  | 0.07416        |
| regimemono:treatedMale         | -0.03515 | 0.09322  | -0.377 | 0.70617        |
| regimepoly:treatedMale         | 0.11752  | 0.09282  | 1.266  | 0.20548        |
| regimerelax:treatedMale        | 0.02184  | 0.097    | 0.225  | 0.82189        |

986

987 Anova table (type II SS):

|                  | X2       | Df | Pr(>X2)          |
|------------------|----------|----|------------------|
| regime           | 60.5142  | 3  | <b>&lt;0.001</b> |
| treatment        | 179.0658 | 2  | <b>&lt;0.001</b> |
| block            | 22.9029  | 2  | <b>&lt;0.001</b> |
| counter          | 0.2365   | 1  | 0.62678          |
| regime:treatment | 14.0398  | 6  | <b>0.02919</b>   |

988

989

990 **Supplement S4:** Details global model – adult heat shock

991 `glmer(offspring ~ regime*treatment + block*treatment + counter + (1|line) +`  
 992 `(1|treatment:line) + (1|familyID_female) + (1|familyID_male) + (1|OLRE_ID),`  
 993 `family="poisson", data = data,`  
 994 `control=glmerControl(optimizer="bobyqa",optCtrl=list(maxfun=100000)))`

995 Sample size: 1858, groups: OLRE\_ID, 1858; familyID\_male, 343; familyID\_female, 343;

996 treatment:line, 36; line, 12

997

998 Random effects:

| Groups          | Variance | Std.Dev. |
|-----------------|----------|----------|
| OLRE_ID         | 2.67E-01 | 5.17E-01 |
| familyID_male   | 2.29E-02 | 1.51E-01 |
| familyID_female | 8.62E-03 | 9.28E-02 |
| treatment:line  | 0.00E+00 | 0.00E+00 |
| line            | 0.00E+00 | 0.00E+00 |

999

1000 Fixed effects:

|                                | Estimate | Std.Err. | z      | Pr(> z )       |
|--------------------------------|----------|----------|--------|----------------|
| Intercept (ctrl, benign temp.) | 4.59271  | 0.04831  | 95.067 | <0.001         |
| regimemono                     | -0.12807 | 0.05713  | -2.242 | <b>0.02498</b> |
| regimepoly                     | -0.16222 | 0.05798  | -2.798 | <b>0.00515</b> |
| regimerelax                    | -0.40836 | 0.06316  | -6.465 | <0.001         |
| treatedFemale                  | -0.14945 | 0.0695   | -2.15  | <b>0.03152</b> |
| treatedMale                    | -0.05093 | 0.06956  | -0.732 | 0.46409        |
| block2                         | -0.20795 | 0.05093  | -4.083 | <0.001         |
| block3                         | -0.07442 | 0.05336  | -1.395 | 0.16309        |
| counter2                       | 0.03837  | 0.02666  | 1.439  | 0.15014        |
| regimemono:treatedFemale       | 0.09522  | 0.08499  | 1.12   | 0.26255        |
| regimepoly:treatedFemale       | 0.15054  | 0.08471  | 1.777  | 0.07554        |
| regimerelax:treatedFemale      | 0.11093  | 0.09022  | 1.229  | 0.21889        |

|                         |          |         |        |                  |
|-------------------------|----------|---------|--------|------------------|
| regimemono:treatedMale  | -0.02127 | 0.08308 | -0.256 | 0.79788          |
| regimepoly:treatedMale  | 0.04498  | 0.0842  | 0.534  | 0.59318          |
| regimerelax:treatedMale | 0.02312  | 0.08897 | 0.26   | 0.795            |
| treatedFemale:block2    | 0.05539  | 0.07281 | 0.761  | 0.44682          |
| treatedMale:block2      | 0.07261  | 0.07233 | 1.004  | 0.31539          |
| treatedFemale:block3    | -0.32439 | 0.07928 | -4.091 | <b>&lt;0.001</b> |
| treatedMale:block3      | -0.15126 | 0.07624 | -1.984 | <b>0.04724</b>   |

1001

1002 Anova table (type II SS):

|                  | $\chi^2$ | Df | Pr(>X2)          |
|------------------|----------|----|------------------|
| regime           | 68.2803  | 3  | <b>&lt;0.001</b> |
| treatment        | 17.1739  | 2  | <b>&lt;0.001</b> |
| block            | 31.7977  | 2  | <b>&lt;0.001</b> |
| counter          | 2.0708   | 1  | 0.1501429        |
| regime:treatment | 4.0144   | 6  | 0.6747337        |
| treatment:block  | 25.3058  | 4  | <b>&lt;0.001</b> |

1003

1004

1005

1006

1007 **Supplement S5:** Literature review

1008 To put the variation in the sex-specificity of TSF obtained across the various data sets  
1009 presented in our study into perspective, we performed a non-exhaustive literature search  
1010 for studies reporting sex-specific effects of heat stress on fertility measured for both sexes  
1011 within the same experiment applying the same heat stress treatment. The literature search  
1012 was executed between the 3.5.2021 and the 22.5.2021 using Google Scholar. We  
1013 considered the results of a search for titles using the key words “fertility”, “heat”,  
1014 “reproduction”, “sex”, “stress”, and “temperature”, as well as literature cited by papers  
1015 matching the initial search. Note that the literature search was non-exhaustive, but that we  
1016 included all studies we could find that had measured fertility for both sexes in terms of  
1017 reproductive output. Hence, we excluded studies that had measured traits related to  
1018 fertility, such as testis size in males or egg maturation rate in females. This resulted in 12  
1019 studies for further analysis (shown in Table S6 below)

1020 We extracted values, and the corresponding standard errors, of male and female  
1021 reproductive output under benign and stressful temperature (including development at  
1022 elevated temperature, heat shock and ramping temperatures). Figure 4 only includes pairs  
1023 of values where the stress treatment led to a statistically significant decrease in fertility in at  
1024 least one sex. Supplementary table S6 contains all treatments of the included studies, also  
1025 such without significant effects in either sex. We calculated the TSF as the proportional loss  
1026 in fertility due to temperature stress:

$$\text{TSF} = 1 - \frac{f_{\text{stress}}}{f_{\text{benign}}}$$

1027

1028 We then proceeded to calculate a standardised estimate of sexual dimorphism in TSF:

1029

$$\text{SD}_{\text{TSF}} = \frac{(\text{TSF}_{\text{female}} - \text{TSF}_{\text{male}})}{(\text{TSF}_{\text{female}} + \text{TSF}_{\text{male}})/2}$$

1030

1031 A given  $SD_{TSF}$  from this study was derived by first calculating the TSF of one sex in a given  
1032 experimental condition (e.g.  $TSF_{female}$  with remating but no cohabitation from experiment  
1033 1.2) and then always using the TSF observed in one of the two main experiments (1.1 for  
1034 juvenile stress and 2.1 for adult stress) for the opposite sex from control populations as  
1035 comparison (e.g.  $TSF_{male}$  from experiment 1.1). To assess whether the obtained values of  
1036  $SD_{TSF}$  were different from zero we propagated the uncertainty in male and female  
1037 reproductive output to calculate 95% confidence intervals. We performed no formal  
1038 statistical analysis on this dataset as it only serves to illustrate the comparison of intra- and  
1039 interspecific variation in TSF found in this and other studies, and the number of studies is  
1040 limited.

1041

1042

1043 **Supplement S6:** Values extracted from studies meeting the criteria outlined in supplement  
 1044 S5. Only values obtained for stress conditions under which at least one sex showed a  
 1045 significant fitness reduction were included in the figures presented in the main manuscript.  
 1046 (2012)

| Study                                     | Heat stress         | Stress stage | Significant fertility loss | Species                | Female load   | Male load     | TSF dimorphism |
|-------------------------------------------|---------------------|--------------|----------------------------|------------------------|---------------|---------------|----------------|
| This study                                | developmental       | juvenile     | yes                        | <i>C. maculatus</i>    | 0.319 ± 0.024 | 0.221 ± 0.022 | 0.366 ± 0.123  |
| This study                                | developmental       | juvenile     | yes                        | <i>C. maculatus</i>    | 0.307 ± 0.03  | 0.227 ± 0.031 | 0.298 ± 0.161  |
| This study                                | developmental       | juvenile     | yes                        | <i>C. maculatus</i>    | 0.377 ± 0.033 | 0.158 ± 0.031 | 0.817 ± 0.183  |
| This study                                | developmental       | juvenile     | yes                        | <i>C. maculatus</i>    | 0.273 ± 0.039 | 0.209 ± 0.046 | 0.268 ± 0.253  |
| This study                                | developmental       | juvenile     | yes                        | <i>C. maculatus</i>    | 0.108 ± 0.031 | 0.114 ± 0.029 | -0.047 ± 0.384 |
| This study                                | developmental       | juvenile     | yes                        | <i>C. maculatus</i>    | 0.133 ± 0.046 | 0.221 ± 0.022 | -0.497 ± 0.295 |
| This study                                | developmental       | juvenile     | yes                        | <i>C. maculatus</i>    | 0 ± 0.035     | 0.221 ± 0.022 | -2 ± 0.528     |
| This study                                | developmental       | juvenile     | yes                        | <i>C. maculatus</i>    | 0.126 ± 0.037 | 0.221 ± 0.022 | -0.547 ± 0.259 |
| This study                                | 20 min heat shock   | adult        | yes                        | <i>C. maculatus</i>    | 0.129 ± 0.028 | 0.021 ± 0.026 | 1.444 ± 0.629  |
| This study                                | 20 min heat shock   | adult        | yes                        | <i>C. maculatus</i>    | 0.129 ± 0.028 | 0.265 ± 0.065 | -0.689 ± 0.38  |
| This study                                | 20 min heat shock   | adult        | yes                        | <i>C. maculatus</i>    | 0.129 ± 0.028 | 0.013 ± 0.058 | 1.632 ± 1.171  |
| This study                                | 20 min heat shock   | adult        | yes                        | <i>C. maculatus</i>    | 0.129 ± 0.028 | 0.181 ± 0.051 | -0.337 ± 0.381 |
| This study                                | 20 min heat shock   | adult        | yes                        | <i>C. maculatus</i>    | 0.129 ± 0.028 | 0.065 ± 0.05  | 0.663 ± 0.62   |
| This study                                | 20 min heat shock   | adult        | no                         | <i>C. maculatus</i>    | 0.085 ± 0.031 | 0.046 ± 0.032 | 0.607 ± 0.702  |
| This study                                | 20 min heat shock   | adult        | no                         | <i>C. maculatus</i>    | 0.052 ± 0.035 | 0.015 ± 0.034 | 1.103 ± 1.641  |
| This study                                | 20 min heat shock   | adult        | no                         | <i>C. maculatus</i>    | 0.092 ± 0.05  | 0.037 ± 0.051 | 0.851 ± 1.203  |
| Martinossi-Alilibert <i>et al.</i> , 2019 | developmental       | juvenile     | yes                        | <i>C. maculatus</i>    | 0.133 ± 0.025 | 0.292 ± 0.03  | -0.749 ± 0.196 |
| Martinossi-Alilibert <i>et al.</i> , 2019 | developmental       | juvenile     | yes                        | <i>C. maculatus</i>    | 0.121 ± 0.023 | 0.096 ± 0.036 | 0.226 ± 0.399  |
| Martinossi-Alilibert <i>et al.</i> , 2019 | developmental       | juvenile     | yes                        | <i>C. maculatus</i>    | 0.131 ± 0.025 | 0.23 ± 0.03   | -0.552 ± 0.225 |
| Martinossi-Alilibert <i>et al.</i> , 2017 | developmental       | juvenile     | yes                        | <i>C. maculatus</i>    | 0.125 ± 0.028 | 0.087 ± 0.04  | 0.358 ± 0.473  |
| Martinossi-Alilibert <i>et al.</i> , 2017 | developmental       | juvenile     | yes                        | <i>C. maculatus</i>    | 0.533 ± 0.027 | 0.885 ± 0.018 | -0.497 ± 0.047 |
| Mahroof <i>et al.</i> , 2005              | 1h heat shock       | juvenile     | yes                        | <i>T. castaneum</i>    | 0.796 ± 0.079 | 0.548 ± 0.084 | 0.368 ± 0.175  |
| Mahroof <i>et al.</i> , 2005              | 1h heat shock       | juvenile     | yes                        | <i>T. castaneum</i>    | 0.59 ± 0.024  | 0.209 ± 0.029 | 0.954 ± 0.104  |
| Mahroof <i>et al.</i> , 2005              | 39min heat shock    | adult        | yes                        | <i>T. castaneum</i>    | 0.475 ± 0.045 | 0.516 ± 0.051 | -0.083 ± 0.138 |
| Mahroof <i>et al.</i> , 2005              | 39min heat shock    | adult        | yes                        | <i>T. castaneum</i>    | 0.488 ± 0.045 | 0.589 ± 0.012 | -0.187 ± 0.086 |
| Sales <i>et al.</i> , 2018                | 5d heat wave        | adult        | yes                        | <i>T. castaneum</i>    | 0.081 ± 0.065 | 0.416 ± 0.046 | -1.346 ± 0.385 |
| Sales <i>et al.</i> , 2018                | 5d heat wave        | adult        | yes                        | <i>T. castaneum</i>    | 0.176 ± 0.063 | 0.587 ± 0.058 | -1.076 ± 0.254 |
| Sales <i>et al.</i> , 2018                | 5d heat wave        | adult        | no                         | <i>T. castaneum</i>    | 0 ± 0.057     | 0.273 ± 0.047 | -2 ± 0.76      |
| Sales <i>et al.</i> , 2018                | 5d heat wave        | adult        | no                         | <i>T. castaneum</i>    | 0.106 ± 0.067 | 0.25 ± 0.051  | -0.806 ± 0.508 |
| Evans <i>et al.</i> , 2018                | 24h heat wave       | adult        | yes                        | <i>D. sukukii</i>      | 0.607 ± 0.051 | 0.191 ± 0.104 | 1.042 ± 0.327  |
| Evans <i>et al.</i> , 2018                | 24h heat wave       | adult        | yes                        | <i>D. sukukii</i>      | 0.64 ± 0.044  | 0.236 ± 0.074 | 0.923 ± 0.218  |
| Evans <i>et al.</i> , 2018                | 24h heat wave       | adult        | yes                        | <i>D. sukukii</i>      | 0.427 ± 0.067 | 0.685 ± 0.04  | -0.465 ± 0.144 |
| Evans <i>et al.</i> , 2018                | 24h heat wave       | adult        | yes                        | <i>D. sukukii</i>      | 0.719 ± 0.036 | 0.674 ± 0.052 | 0.065 ± 0.091  |
| Evans <i>et al.</i> , 2018                | 72h heat wave       | adult        | yes                        | <i>D. sukukii</i>      | 0.607 ± 0.057 | 0.472 ± 0.077 | 0.25 ± 0.178   |
| Evans <i>et al.</i> , 2018                | 72h heat wave       | adult        | yes                        | <i>D. sukukii</i>      | 0.775 ± 0.033 | 0 ± 0.108     | 2 ± 0.412      |
| Evans <i>et al.</i> , 2018                | 72h heat wave       | adult        | yes                        | <i>D. sukukii</i>      | 0.809 ± 0.027 | 0.719 ± 0.033 | 0.118 ± 0.055  |
| Evans <i>et al.</i> , 2018                | 72h heat wave       | adult        | yes                        | <i>D. sukukii</i>      | 0.865 ± 0.019 | 0.865 ± 0.024 | 0 ± 0.035      |
| Walsh <i>et al.</i> , 2020                | 4h pupal heat shock | juvenile     | yes                        | <i>D. virilis</i>      | 0.079 ± 0.079 | 0.581 ± 0.089 | -1.523 ± 0.453 |
| Krebs & Loeschke, 1994                    | 90 min heat shock   | adult        | yes                        | <i>D. melanogaster</i> | 0.388 ± 0.075 | 0 ± 0.11      | 2 ± 0.97       |
| Rinehart <i>et al.</i> , 2000             | 1h heat shock       | adult        | yes                        | <i>S. crassipalpis</i> | 0.166 ± 0.084 | 1 ± 0         | -1.429 ± 0.178 |
| Zhang <i>et al.</i> , 2013                | 4h heat shock       | adult        | yes                        | <i>P. xylostella</i>   | 0.279 ± 0.048 | 0.057 ± 0.042 | 1.319 ± 0.457  |
| Zhang <i>et al.</i> , 2013                | 3h heat shock       | adult        | no                         | <i>P. xylostella</i>   | 0.029 ± 0.043 | 0 ± 0.044     | 2 ± 6.102      |
| Zhang <i>et al.</i> , 2013                | 5h heat shock       | adult        | no                         | <i>P. xylostella</i>   | 0.164 ± 0.036 | 0.1 ± 0.043   | 0.486 ± 0.436  |
| Janowitz & Fischer, 2011                  | 1h heat shock       | adult        | yes                        | <i>B. anynana</i>      | 0.298 ± 0.073 | 0 ± 0.096     | 2 ± 1.141      |
| Roux <i>et al.</i> , 2010                 | 1h heat shock       | adult        | yes                        | <i>A. avenae</i>       | 0.41 ± 0.272  | 0.075 ± 0.311 | 1.385 ± 2.076  |
| Piyaphongkul <i>et al.</i> , 2012         | ramping             | adult        | yes                        | <i>N. lugens</i>       | 0.422 ± 0.049 | 0.384 ± 0.059 | 0.096 ± 0.191  |

1047
